# Supplementary material for: Network Pharmacology/Metabolomics‐Based Validation of AMPK and PI3K/AKT Signaling Pathway as a Central Role of Shengqi Fuzheng Injection Regulation of Mitochondrial Dysfunction in Cancer‐Related Fatigue
Source: Hindawi journal article supplement (doi:10.1155/2021/5556212), 2021-01-01
Supplement: f1 [file 5556212.f1.zip]

| ID       | name        | Super-path | Sub-path    | w class     | sub_class   | mz                 | rt                 |
|----------|-------------|------------|-------------|-------------|-------------|--------------------|--------------------|
| M364T131 | Guanosine   | Nucleotide | Purine      | met         | Azacyclic c | Alcohols a         | 364.06473 131.2135 |
| M447T90  | CDP-Etha    | Lipid      | Glyceroph   | Azacyclic c | Alcohols a  | 447.06464 90.2089  |                    |
| M266T94  | Thiamine    | Cofactors  | cThiamine   | Azacyclic c | Alcohols a  | 266.12352 94.297   |                    |
| M155T66  | N-Methyle   | Lipid      | Glyceroph   | Organic ox  | Amines      | 155.0338 65.52855  |                    |
| M134T44  | 3-Dehydro   | Cofactors  | cAscorbate  | Carboxylic  | Alcohols a  | 134.02332 43.76635 |                    |
| M357T335 | Pantethein  | Cofactors  | cPantothen  | Carboximi   | Alcohols a  | 357.08908 334.6925 |                    |
| M109T45  | p-Cresol    | Amino aci  | Phenylalar  | Benzene a   | 1-hydroxy-  | 109.06503 44.6803  |                    |
| M129T615 | Oxoglutar   | Carbohydr  | Citrate     | cyc         | Keto acids  | Gamma-ke           | 129.12735 614.613  |
| M132T96_ | Creatine    | Amino aci  | Arginine    | a           | Carboxylic  | Amino aci          | 132.07628 96.11715 |
| M104T86  | gamma-Ar    | Amino aci  | Alanine,    | a           | Carboxylic  | Amino aci          | 104.10693 86.03045 |
| M132T231 | L-Leucine   | Amino aci  | Valine, leu | Carboxylic  | Amino aci   | 132.10128 230.7525 |                    |
| M153T188 | Xanthine    | Nucleotide | Purine      | met         | Imidazopy   | Purines an         | 153.04037 187.625  |
| M111T830 | Pyrrole-2-c | Amino aci  | Arginine    | a           | Pyrroles    | Pyrrole car        | 111.02014 830.382  |
| M155T33  | Gentisic ac | Amino aci  | Tyrosine    | n           | Benzene a   | Benzoic ac         | 154.98935 33.20635 |
| M172T355 | 3-Dehydro   | Amino aci  | Phenylalar  | NULL        | NULL        | 171.9922 354.592   |                    |
| M159T174 | 4,5-Dihydr  | Nucleotide | Pyrimidine  | Carboxylic  | Amino aci   | 158.9601 173.9245  |                    |
| M307T204 | Glutathior  | Amino aci  | Glutathior  | NULL        | NULL        | 307.08273 203.8925 |                    |
| M91T80   | L-Lactic ac | Carbohydr  | Pyruvate    | n           | Hydroxy a   | Alpha hyd          | 90.977133 79.7897  |
| M182T207 | L-Tyrosine  | Amino aci  | Tyrosine    | n           | Carboxylic  | Amino aci          | 182.08086 206.614  |
| M282T833 | Oleic acid  | Lipid      | Fatty acid  | Fatty Acyl  | Fatty acids | 282.27844 833.0215 |                    |
| M150T142 | L-Methion   | Amino aci  | Cysteine    | a           | Carboxylic  | Amino aci          | 150.05661 142.4235 |
| M148T89  | L-Glutami   | Amino aci  | Alanine,    | a           | Carboxylic  | Amino aci          | 148.05996 88.9687  |
| M116T98  | L-Proline   | Amino aci  | Arginine    | a           | Carboxylic  | Amino aci          | 116.07037 97.71805 |
| M118T89  | Betaine     | Amino aci  | Glycine,    | se          | Carboxylic  | Amino aci          | 118.0612 89.3401   |
| M268T294 | Adenosine   | Nucleotide | Purine      | met         | Purine nuc  | NULL               | 268.10327 293.6905 |
| M126T71_ | Thymine     | Nucleotide | Pyrimidine  | Diazines    | Pyrimidine  | 125.986 70.64725   |                    |
| M102T34  | 2-Ketobuty  | Carbohydr  | Propanoat   | Keto acids  | Short-chain | 102.03395 34.47215 |                    |
| M130T829 | Ketoleucin  | Amino aci  | Valine, leu | Keto acids  | Short-chain | 130.15885 829.358  |                    |
| M256T776 | Palmitic ac | Lipid      | Fatty acid  | Fatty Acyl  | Fatty acids | 256.26315 775.54   |                    |
| M148T45  | trans-Cinn  | Amino aci  | Phenylalar  | NULL        | NULL        | 148.01807 44.83415 |                    |
| M99T33_1 | Maleic aci  | Carbohydr  | Butanoate   | NULL        | NULL        | 98.511879 33.20465 |                    |
| M113T133 | Uracil      | Nucleotide | Pyrimidine  | Diazines    | Pyrimidine  | 113.03453 133.248  |                    |
| M149T168 | L-2-Hydro   | Lipid      | Hydroxy fc  | Fatty Acyl  | Fatty acids | 148.97608 168.006  |                    |
| M167T504 | Quinolinic  | Cofactors  | cNicotinate | Pyridines a | Pyridineca  | 167.01236 504.104  |                    |
| M269T303 | Inosine     | Nucleotide | Purine      | met         | Purine nuc  | NULL               | 269.08745 302.9315 |
| M199T657 | Vanillylma  | Amino aci  | Tyrosine    | n           | Phenols     | Methoxyph          | 199.02925 656.545  |
| M181T828 | D-Fructose  | Carbohydr  | Galactose   | Organooxy   | Carbohydr   | 181.0146 827.9375  |                    |
| M147T835 | 4-Hydroxy   | Xenobiotic | Food Com    | jCinnamic   | cHydroxycir | 146.98017 835.0925 |                    |
| M298T397 | 5'-Methylt  | Amino aci  | Cysteine    | a           | 5'-deoxyrib | 5'-deoxy-5'-       | 298.09595 396.9725 |

|          |             |             |             |                       |             |                    |
|----------|-------------|-------------|-------------|-----------------------|-------------|--------------------|
| M194T806 | Phenylacet  | Amino aci   | Phenylalan  | Carboxylic Amino aci  | 194.15378   | 806.212            |
| M162T90  | L-Carnitin  | Lipid       | Carnitine r | Organonit             | Quaternar   | 162.11222 90.3605  |
| M228T758 | Deoxyuridi  | Nucleotide  | Pyrimidine  | Pyrimidine            | Pyrimidine  | 228.19557 757.535  |
| M302T802 | Sphingani   | rLipid      | SphingoLi   | rOrganonit            | Amines      | 302.30465 802.076  |
| M147T77_ | L-Lysine    | Amino aci   | Lysine met  | Carboxylic Amino aci  |             | 147.11235 76.63885 |
| M338T793 | Erucic aci  | Lipid       | Biosynthes  | Fatty Acyl            | Fatty acids | 338.34062 792.791  |
| M243T392 | 1-Hexadec   | Lipid       | Fatty acid  | Fatty Acyl            | Fatty alcoh | 243.1817 392.287   |
| M174T94  | Citrulline  | Amino aci   | Arginine b  | Carboxylic Amino aci  |             | 174.08712 93.7228  |
| M179T657 | L-Gulonol   | Cofactors   | cAscorbate  | Lactones              | Gamma b     | 178.99029 656.64   |
| M156T788 | 3-Indoleac  | Amino aci   | Tryptopha   | Indoles an            | Indoles     | 156.12022 788.257  |
| M132T81  | L-Aspartic  | Amino aci   | Alanine, a  | Carboxylic Amino aci  |             | 132.02855 81.37925 |
| M183T33_ | Homovani    | Amino aci   | Tyrosine r  | Phenols               | Methoxyp    | 182.98358 33.2075  |
| M170T35  | Norepinep   | Amino aci   | Tyrosine r  | Phenols               | Benzenedic  | 169.97628 34.9985  |
| M376T809 | Riboflavin  | Cofactors   | cRiboflavin | Pteridines            | Alloxazine  | 376.25673 809.045  |
| M177T44_ | Ascorbate   | Cofactors   | cAscorbate  | NULL                  | NULL        | 176.97149 44.29635 |
| M88T833  | Butyric aci | Lipid       | Saturated   | Fatty Acyl            | Fatty acids | 88.076186 832.562  |
| M170T86  | Pyridoxine  | Cofactors   | cVitamin B  | Pyridines             | aPyridoxine | 169.98562 86.2015  |
| M151T71_ | D-Ribose    | Carbohydr   | Pentose ph  | Organooxy             | Carbohydr   | 151.03447 70.5069  |
| M122T72  | Benzoate    | Xenobiotic  | Benzoate c  | NULL                  | NULL        | 122.01916 72.2185  |
| M229T758 | Myristic ac | Lipid       | Fatty acid  | Fatty Acyl            | Fatty acids | 229.17956 757.627  |
| M124T88  | Taurine     | Amino aci   | Taurine ar  | Organic su            | Organosul   | 124.00597 88.06515 |
| M349T191 | IMP         | Nucleotide  | Purine met  | Purine nuc            | Purine ribo | 349.0528 190.921   |
| M200T36_ | Dodecanoi   | Lipid       | Fatty acid  | Fatty Acyl            | Fatty acids | 199.98755 35.8947  |
| M282T314 | Guanosine   | Nucleotide  | Purine met  | Purine nuc            | NULL        | 282.08464 313.748  |
| M171T41  | Dihydroxy   | Carbohydr   | Glycolysis  | Organooxy             | Carbohydr   | 171.14836 40.67    |
| M324T101 | CMP         | Nucleotide  | Pyrimidine  | Pyrimidine            | Pyrimidine  | 324.05795 100.779  |
| M118T92  | L-Threonin  | Amino aci   | Glycine, se | Carboxylic Amino aci  |             | 118.0496 91.53075  |
| M132T43  | Glutaric a  | Amino aci   | Lysine deg  | Carboxylic Dicarboxyl |             | 131.97415 42.718   |
| M110T138 | Hydroquin   | Xenobiotic  | Chlorocycl  | Phenols               | Benzenedic  | 110.02009 138.419  |
| M393T809 | Deoxychol   | Lipid       | Secondary   | Steroids an           | Bile acids, | 393.2825 809.045   |
| M300T454 | all-trans-R | Cofactors   | cRetinol me | Prenol lipi           | Retinoids   | 300.19737 453.864  |
| M387T810 | Cholestero  | Lipid       | Steroid bio | Steroids an           | Cholestane  | 387.19513 809.5515 |
| M226T704 | Porphobili  | Cofactors   | cPorphyrin  | Organonit             | Amines      | 226.17957 703.964  |
| M335T102 | Nicotinam   | Cofactors   | cNicotinate | Pyridine n            | Nicotinam   | 335.06544 102.1395 |
| M115T391 | Dihydrou    | rNucleotide | Pyrimidine  | Diazines              | Pyrimidine  | 115.03878 390.7165 |
| M112T120 | Cytosine    | Nucleotide  | Pyrimidine  | Diazines              | Pyrimidine  | 112.05068 120.2785 |
| M156T81  | L-Histidin  | Amino aci   | Histidine n | Carboxylic Amino aci  |             | 156.07667 80.74105 |
| M106T85_ | L-Serine    | Amino aci   | Glycine, se | Carboxylic Amino aci  |             | 106.04987 85.3808  |
| M185T69  | 3,4-Dihydr  | Amino aci   | Tyrosine r  | NULL                  | NULL        | 184.98515 69.1898  |
| M133T85  | L-Asparagi  | Amino aci   | Alanine, a  | Carboxylic Amino aci  |             | 133.06063 85.47165 |

|           |              |             |             |             |             |           |          |
|-----------|--------------|-------------|-------------|-------------|-------------|-----------|----------|
| M86T233   | Diacetyl     | Carbohydr   | Butanoate   | Organooxy   | Carbonyl c  | 86.060395 | 233.163  |
| M102T447  | Isovaleric c | Lipid       | Saturated f | Fatty Acyl  | Fatty acids | 102.09145 | 446.659  |
| M175T80_  | L-Arginine   | Amino aci   | Arginine b  | Carboxylic  | Amino aci   | 174.93778 | 80.08285 |
| M137T234  | Salicylate   | Xenobiotic  | Naphthale   | Benzene a   | Benzoic ac  | 137.02303 | 233.835  |
| M218T579  | N-Acetylse   | Amino aci   | Tryptopha   | Indoles an  | Hydroxyin   | 218.21046 | 578.625  |
| M312T827  | Arachidic c  | Lipid       | Biosynthes  | Fatty Acyl  | Fatty acids | 312.32516 | 827.0205 |
| M613T204_ | Oxidized g   | Amino aci   | Glutathior  | Carboxylic  | Amino aci   | 613.15405 | 203.991  |
| M220T368  | Pantotheni   | Cofactors c | Pantothen   | Alcohols a  | Polyols     | 220.11729 | 367.979  |
| M126T141  | Ciliatine    | Amino aci   | Phosphonc   | Organic pl  | Organic pl  | 125.98612 | 141.424  |
| M110T546  | 2-Aminopl    | Xenobiotic  | Aminoben    | NULL        | NULL        | 110.05999 | 545.867  |
| M102T828  | Succinic ac  | Carbohydr   | Butanoate   | Fatty Acyl  | Fatty acids | 102.09126 | 828.252  |
| M208T563  | L-Kynuren    | Amino aci   | Tryptopha   | Organooxy   | Carbonyl c  | 208.13085 | 563.171  |
| M346T778  | Cortexolon   | Lipid       | Steroid ho  | Steroids an | Hydroxyste  | 346.33099 | 777.672  |
| M281T837_ | Linoleic ac  | Lipid       | Linoleic ac | Fatty Acyl  | Lineolic ac | 281.24688 | 837.037  |
| M137T158  | 3-Hydroxyl   | Xenobiotic  | Benzoate c  | Benzene a   | Benzoic ac  | 137.02304 | 158.366  |
| M195T365  | D-Glucuro    | Carbohydr   | Pentose an  | NULL        | NULL        | 195.12253 | 364.793  |
| M94T32    | Phenol       | Xenobiotic  | Aminoben    | NULL        | NULL        | 94.045261 | 32.4342  |
| M102T88   | 1-Aminocy    | Amino aci   | Cysteine a  | Carboxylic  | Amino aci   | 102.05549 | 88.0431  |
| M121T71   | L-Cysteine   | Amino aci   | Cysteine a  | Carboxylic  | Amino aci   | 120.98082 | 70.5308  |
| M399T86   | S-Adenosyl   | Cofactors c | Cofactors   | 5'-deoxyrib | 5'-deoxy-5' | 399.14119 | 85.8174  |
| M132T52   | cis-4-Hydr   | Amino aci   | Arginine a  | Carboxylic  | Amino aci   | 132.06542 | 51.7208  |
| M222T99   | N-Acetyl-I   | Carbohydr   | Amino sug   | Organooxy   | Carbohydr   | 222.09663 | 99.17065 |
| M151T316  | L-Arabino    | Carbohydr   | Pentose an  | Organooxy   | Carbohydr   | 151.09626 | 316.0065 |
| M175T188  | 1H-Indole-   | Amino aci   | Tryptopha   | Indoles an  | Indoles     | 175.02235 | 187.625  |
| M170T404  | 3,4-Dihydr   | Amino aci   | Tyrosine r  | Phenols     | Benzenedic  | 170.0596  | 403.7185 |
| M181T223  | 4-Hydroxyj   | Amino aci   | Tyrosine r  | Benzene a   | Phenylpyru  | 181.02569 | 222.822  |
| M301T810  | Eicosapent   | Lipid       | Biosynthes  | NULL        | NULL        | 301.21766 | 810.257  |
| M183T457  | Mannitol     | Carbohydr   | Fructose a  | Organooxy   | Carbohydr   | 183.10065 | 456.8485 |
| M138T346  | Tyramine     | Amino aci   | Tyrosine r  | Benzene a   | Phenethylc  | 138.09116 | 345.669  |
| M137T538  | Phenylacet   | Amino aci   | Phenylalar  | Benzene a   | NULL        | 137.05943 | 537.527  |
| M277T791  | 6-Phospho    | Carbohydr   | Pentose ph  | Organooxy   | Carbohydr   | 277.17903 | 791.2375 |
| M248T166  | Pyridoxal f  | Cofactors c | Vitamin B   | Pyridines a | Pyridine cc | 248.03109 | 166.1945 |
| M341T94   | Cellobiose   | Carbohydr   | Starch and  | NULL        | NULL        | 341.10765 | 93.7666  |
| M90T546   | Putrescine   | Amino aci   | Arginine a  | NULL        | NULL        | 89.506433 | 545.827  |
| M252T305  | 2'-Deoxyac   | Nucleotide  | Purine met  | NULL        | NULL        | 252.10841 | 305.3405 |
| M181T396  | Theophylli   | Xenobiotic  | Caffeine m  | Imidazopy   | Purines an  | 181.07059 | 396.485  |
| M224T34   | Methyl jas   | Lipid       | alpha-Linc  | Fatty Acyl  | Lineolic ac | 224.01112 | 34.47215 |
| M190T461  | Kynurenic    | Amino aci   | Tryptopha   | Quinolines  | Quinoline   | 190.088   | 460.712  |
| M185T202  | Phosphose    | Amino aci   | Glycine, se | Carboxylic  | Amino aci   | 185.16468 | 202.4885 |
| M133T41   | Cinnamal     | Unknow      | Unknow      | Cinnamal    | NULL        | 133.06466 | 41.38175 |

|          |             |             |             |             |             |           |          |
|----------|-------------|-------------|-------------|-------------|-------------|-----------|----------|
| M157T79_ | Shikimic a  | Amino aci   | Phenylalar  | Organooxy   | Alcohols a  | 157.04768 | 79.4301  |
| M195T62  | 2-Amino-2-  | Carbohydr   | Pentose ph  | NULL        | NULL        | 195.07635 | 61.7091  |
| M189T131 | N-Acetylgl  | Amino aci   | Arginine b  | Carboxylic  | Amino aci   | 189.08705 | 130.933  |
| M284T489 | Stearic aci | Lipid       | Fatty acid  | Fatty Acyl  | Fatty acids | 284.18463 | 488.502  |
| M330T307 | Cyclic AMI  | Nucleotide  | Purine met  | Purine nuc  | Cyclic puri | 330.0584  | 306.634  |
| M227T574 | Deoxycytid  | Nucleotide  | Pyrimidine  | Pyrimidine  | Pyrimidine  | 227.1635  | 573.895  |
| M123T158 | Niacinami   | Cofactors   | (Nicotinate | Pyridines a | Pyridineca  | 123.05504 | 157.645  |
| M300T831 | Sphingosin  | Lipid       | SphingoLi   | Organoniti  | Amines      | 300.28959 | 831.447  |
| M118T407 | Indole      | Amino aci   | Tryptopha   | Indoles an  | Indoles     | 118.06479 | 407.0305 |
| M325T161 | UMP         | Nucleotide  | Pyrimidine  | Pyrimidine  | Pyrimidine  | 325.04237 | 160.547  |
| M198T176 | Selenometl  | Amino aci   | Selenocom   | Carboxylic  | Amino aci   | 198.00095 | 176.3395 |
| M179T147 | Cysteinygl  | Amino aci   | Glutathior  | Carboxylic  | Amino aci   | 179.04871 | 146.737  |
| M245T202 | Uridine     | Nucleotide  | Pyrimidine  | Pyrimidine  | NULL        | 245.07628 | 202.338  |
| M348T279 | AMP         | Nucleotide  | Purine met  | Purine nuc  | Purine ribe | 348.06927 | 278.8135 |
| M152T409 | D-Cathine   | Amino aci   | Phenylalar  | NULL        | NULL        | 152.10694 | 408.552  |
| M189T125 | N6-Acetyl-  | Amino aci   | Lysine deg  | Carboxylic  | Amino aci   | 189.12444 | 124.814  |
| M132T221 | 5-Aminole   | Cofactors   | (Porphyrin  | Carboxylic  | Amino aci   | 132.06544 | 221.105  |
| M106T85_ | Diethanol   | Lipid       | Glyceroph   | Organoniti  | Amines      | 106.08635 | 84.69095 |
| M380T807 | Sphingosin  | Lipid       | SphingoLi   | Sphingolip  | Phosphosp   | 380.25449 | 807.1225 |
| M163T266 | Nicotine    | Xenobiotic  | Tobacco m   | Pyridines a | Pyrrolidiny | 163.12268 | 265.749  |
| M219T788 | gamma-Gl    | Amino aci   | Glutathior  | Carboxylic  | Amino aci   | 219.09468 | 787.8355 |
| M195T450 | Caffeine    | Xenobiotic  | Caffeine m  | Imidazopy   | Purines an  | 195.08615 | 450.1945 |
| M155T691 | Protocatec  | Xenobiotic  | Benzoate c  | Benzene a   | Benzoic ac  | 155.1064  | 690.626  |
| M133T76  | Ornithine   | Amino aci   | Arginine b  | Carboxylic  | Amino aci   | 133.09689 | 76.4767  |
| M130T88  | Pyroglutan  | Amino aci   | Glutathior  | Carboxylic  | Amino aci   | 130.04972 | 88.36495 |
| M136T207 | 2-Phenylac  | Amino aci   | Phenylalar  | Benzene a   | Phenylacet  | 136.07488 | 206.7035 |
| M86T231  | Piperidine  | Unknow      | Unknow      | Piperidines | NULL        | 86.096761 | 231.2395 |
| M363T74  | Xanthylic   | (Nucleotide | Purine met  | Purine nuc  | Purine ribe | 363.03384 | 74.0761  |
| M308T85  | N-Acetylnc  | Carbohydr   | Amino sug   | NULL        | NULL        | 308.09876 | 85.1476  |
| M380T293 | S-Lactoylgl | Carbohydr   | Pyruvate n  | Carboxylic  | Amino aci   | 380.11069 | 293.3195 |
| M295T357 | Aspartame   | Xenobiotic  | Food com    | Carboxylic  | Amino aci   | 295.1272  | 356.542  |
| M152T304 | Guanine     | Nucleotide  | Purine met  | Imidazopy   | Purines an  | 152.05637 | 303.8465 |
| M251T145 | gamma-L-(   | Peptide     | Gamma-gl    | Carboxylic  | Amino aci   | 251.06884 | 145.086  |
| M261T93  | D-Glucose   | Carbohydr   | Glycolysis  | Organooxy   | Carbohydr   | 261.03663 | 92.7251  |
| M251T321 | Deoxyinosi  | Nucleotide  | Purine met  | Purine nuc  | Purine 2'-d | 251.07793 | 321.282  |
| M143T648 | 5-(2-Hydro  | Cofactors   | (Thiamine   | Azoles      | Thiazoles   | 143.03875 | 648.478  |
| M348T126 | 3'-AMP      | Nucleotide  | Purine met  | Ribonuclec  | NULL        | 348.0692  | 125.7965 |
| M258T89  | Glyceroph   | Lipid       | Glyceroph   | Glyceroph   | Glyceroph   | 258.10949 | 88.6925  |
| M140T829 | Acetylphos  | Carbohydr   | Pyruvate n  | Organic pl  | Phosphate   | 139.9872  | 828.708  |
| M155T86  | Imidazol-5  | Amino aci   | Histidine n | NULL        | NULL        | 155.04251 | 85.55235 |

|          |                 |             |             |             |             |           |          |
|----------|-----------------|-------------|-------------|-------------|-------------|-----------|----------|
| M148T659 | 2-Oxo-4-m Lipid | Oxo fatty c | Fatty Acyls | Fatty acids | 148.01776   | 659.41    |          |
| M184T87  | Phosphory Lipid | Glyceroph   | Organonit   | Quaternar   | 184.07267   | 86.5544   |          |
| M137T89  | 1-Methylni      | Cofactors c | Nicotinate  | Pyridines a | Pyridineca  | 137.07026 | 88.9247  |
| M130T203 | Pyrrolidon      | Amino aci   | D-Glutami   | Carboxylic  | Amino aci   | 130.04973 | 203.479  |
| M130T43  | L-Pipecolic     | Amino aci   | Lysine met  | NULL        | NULL        | 130.08618 | 43.285   |
| M133T143 | 5,6-Dihydr      | Xenobiotic  | Drug meta   | Diazines    | Pyrimidine  | 133.03167 | 142.701  |
| M353T640 | Prostaglan      | Lipid       | Arachidon   | NULL        | NULL        | 353.23074 | 639.8995 |
| M255T108 | Nicotinam       | Cofactors c | Nicotinate  | Organooxy   | Carbohydr   | 255.09704 | 108.157  |
| M138T99  | p-Aminobc       | Cofactors c | Folate bios | Benzene a   | Benzoic ac  | 138.05414 | 99.2765  |
| M130T628 | Agmatine        | Amino aci   | Arginine a  | Organonit   | Guanidine   | 130.12233 | 627.7095 |
| M168T132 | 3-Methoxy       | Amino aci   | Tryptopha   | Benzene a   | Benzoic ac  | 168.06591 | 132.328  |
| M217T364 | N-a-Acetyl      | Amino aci   | Arginine b  | Carboxylic  | Amino aci   | 217.10533 | 363.934  |
| M132T371 | N-Carbam        | Amino aci   | Arginine a  | Carboximi   | Carboximi   | 132.10061 | 370.652  |
| M144T430 | 2-Naphtho       | Xenobiotic  | Metabolism  | Naphthale   | Naphthols   | 144.06556 | 429.791  |
| M295T788 | 13-L-Hydr       | Lipid       | Linoleic ac | Fatty Acyls | Lineolic ac | 295.22641 | 788.026  |
| M265T800 | Phenylacet      | Amino aci   | Phenylalar  | Carboxylic  | Amino aci   | 265.1033  | 799.7025 |
| M146T404 | 2-Dehydro       | Cofactors c | Pantothen   | NULL        | NULL        | 146.05952 | 404.3155 |
| M136T221 | 4-Hydroxy       | Amino aci   | Tyrosine r  | Benzene a   | Phenylacet  | 136.06101 | 220.899  |
| M99T619  | Sulfate         | Xenobiotic  | Chemical    | Non-metal   | Non-metal   | 98.984695 | 618.934  |
| M130T483 | 4-Oxoproli      | Amino aci   | Arginine a  | NULL        | NULL        | 130.04968 | 483.207  |
| M400T819 | Palmitoyl-l     | Lipid       | Fatty acid  | NULL        | NULL        | 400.34027 | 818.6485 |
| M193T221 | 3-Carbam        | Xenobiotic  | Drug meta   | Benzene a   | Phenylacet  | 193.06795 | 221.179  |
| M279T818 | Alpha-dim       | Lipid       | Linoleic ac | Fatty Acyls | Lineolic ac | 279.23126 | 818.002  |
| M169T78  | Pyridoxam       | Cofactors c | Vitamin B   | Pyridines a | Pyridoxam   | 169.09532 | 77.9662  |
| M284T94  | N-Acetyl-a      | Carbohydr   | Amino sug   | NULL        | NULL        | 284.05171 | 94.4128  |
| M163T756 | 2-Deoxystr      | Xenobiotic  | Neomycin,   | NULL        | NULL        | 163.1123  | 755.53   |
| M114T182 | 1-Pyrroline     | Amino aci   | Arginine a  | Pyrrolines  | NULL        | 114.0548  | 181.932  |
| M134T301 | Adenine         | Nucleotide  | Purine met  | Imidazopy   | Purines an  | 134.04529 | 301.4365 |
| M104T143 | 2-Hydroxyl      | Lipid       | Hydroxy fc  | Hydroxy a   | Alpha hyd   | 104.05304 | 142.701  |
| M139T50  | Salicylic ac    | Xenobiotic  | Naphthale   | Benzene a   | Benzoic ac  | 139.03876 | 49.75555 |
| M166T207 | D-Phenyllc      | Amino aci   | Phenylalar  | Phenylpro   | NULL        | 166.05786 | 206.736  |
| M143T181 | Ectoine         | Amino aci   | Glycine, se | NULL        | NULL        | 143.08133 | 181.4975 |
| M146T97  | Acetylcholi     | Lipid       | Glyceroph   | Organonit   | Quaternar   | 146.11732 | 97.33425 |
| M148T92  | 2-Dehydro       | Cofactors c | Ascorbate   | NULL        | NULL        | 148.03886 | 92.18455 |
| M313T789 | 9(S)-HPOI       | Lipid       | Linoleic ac | Fatty Acyls | Lineolic ac | 313.23684 | 788.7645 |
| M153T115 | p-Hydroxy       | Amino aci   | Tyrosine r  | Phenols     | 1-hydroxy-  | 153.05441 | 114.577  |
| M167T838 | 3-(2-Hydro      | Xenobiotic  | Polycyclic  | Phenylpro   | NULL        | 167.06998 | 838.054  |
| M489T92_ | Citicoline      | Lipid       | Glyceroph   | Pyrimidine  | Pyrimidine  | 489.11942 | 91.6316  |
| M313T754 | 17-HYDR         | Lipid       | Steroid hor | NULL        | NULL        | 313.21176 | 753.914  |
| M180T572 | L-Homoph        | Amino aci   | Phenylalar  | NULL        | NULL        | 180.10088 | 572.248  |

|          |             |            |                    |             |             |           |          |
|----------|-------------|------------|--------------------|-------------|-------------|-----------|----------|
| M159T404 | 5-Acetamid  | Amino acid | Lysine degradation | Fatty Acyl  | Fatty acids | 159.09142 | 404.4835 |
| M104T825 | Choline     | Lipid      | Glyceroph          | Organonit   | Quaternar   | 104.10724 | 824.5815 |
| M542T132 | Adenosine   | Nucleotide | Purine met         | Purine nuc  | Purine nuc  | 542.07177 | 132.103  |
| M105T783 | 2-Phenylet  | Amino acid | Phenylalan         | Benzene a   | NULL        | 105.07022 | 783.073  |
| M177T79  | Pyrophosp   | Energy     | Oxidative j        | Non-metal   | Non-metal   | 176.935   | 78.56065 |
| M384T827 | 5a-Cholest  | Lipid      | Steroid bio        | Steroids an | Cholestane  | 384.3468  | 827.046  |
| M201T118 | 4-Fumaryl   | Amino acid | Tyrosine r         | NULL        | NULL        | 201.05199 | 118.0815 |
| M132T405 | 3-Methylin  | Amino acid | Tryptopha          | Indoles an  | Indoles     | 132.08069 | 404.5725 |
| M277T789 | 9(S)-HOT    | Lipid      | alpha-Linc         | NULL        | NULL        | 277.2155  | 788.519  |
| M152T174 | 3,4-Dihydr  | Amino acid | Tyrosine r         | Benzene a   | Phenylacet  | 152.05563 | 174.186  |
| M167T47  | Homovani    | Amino acid | Tyrosine r         | Phenols     | Methoxyp    | 167.05519 | 47.38655 |
| M167T141 | L-Arabino   | Cofactors  | Ascorbate          | NULL        | NULL        | 167.05538 | 140.6295 |
| M290T167 | Ophthalm    | Amino acid | Cysteine a         | NULL        | NULL        | 290.13407 | 167.3715 |
| M175T155 | N-Acetyl    | Amino acid | Arginine b         | Carboxylic  | Amino acid  | 175.10804 | 155.287  |
| M239T298 | 4a-Carbin   | Cofactors  | Folate bios        | Pteridines  | Pterins an  | 239.10207 | 297.8815 |
| M317T640 | 12-Keto-le  | Lipid      | Arachidon          | Fatty Acyl  | Eicosanoid  | 317.20975 | 639.8995 |
| M154T96  | 3-Hydroxy   | Amino acid | Tryptopha          | Benzene a   | Benzoic ac  | 154.05857 | 95.88085 |
| M256T119 | Nicotinate  | Cofactors  | Nicotinate         | Organooxy   | Carbohydr   | 256.08047 | 118.757  |
| M152T499 | N-Methyl    | Amino acid | Tyrosine r         | Benzene a   | Phenethyl   | 152.10676 | 499.1405 |
| M169T77  | D-Glyceral  | Carbohydr  | Glycolysis         | NULL        | NULL        | 168.98966 | 76.8563  |
| M351T771 | Prostaglan  | Lipid      | Arachidon          | Fatty Acyl  | Eicosanoid  | 351.21271 | 770.74   |
| M168T395 | Phosphoen   | Carbohydr  | Pyruvate r         | Organic p   | Phosphate   | 167.98195 | 395.272  |
| M184T128 | Choline su  | Unknow     | Unknow             | NULL        | NULL        | 184.05785 | 128.367  |
| M162T62  | Tryptopha   | Amino acid | Tryptopha          | Indoles an  | Indoles     | 162.09099 | 61.7091  |
| M146T386 | (2R,5S)-2,5 | Amino acid | Lysine degradation | NULL        | NULL        | 146.11734 | 385.836  |
| M180T33  | Aspirin     | Unknow     | Unknow             | Benzene a   | Benzoic ac  | 180.04413 | 33.2099  |
| M147T40  | L-4-Hydro   | Amino acid | Arginine a         | Carboxylic  | Amino acid  | 147.05466 | 40.0109  |
| M204T207 | Indolepyru  | Amino acid | Tryptopha          | Indoles an  | Indolyl car | 204.06287 | 206.7035 |
| M314T397 | Geranyl di  | Lipid      | Monoterpe          | NULL        | NULL        | 314.09032 | 396.795  |
| M156T727 | 4-Imidazol  | Amino acid | Histidine n        | Azoles      | Imidazoles  | 156.04137 | 727.4325 |
| M211T789 | Jasmonic a  | Lipid      | alpha-Linc         | Fatty Acyl  | Lineolic ac | 211.13263 | 788.8685 |
| M146T126 | 4-Guanidir  | Amino acid | Arginine a         | Carboxylic  | Amino acid  | 146.09218 | 126.3045 |
| M217T332 | beta-Alany  | Amino acid | beta-Alani         | Peptidomi   | Hybrid pe   | 217.15445 | 331.908  |
| M176T243 | 2-Hydroxy-  | Carbohydr  | Glyoxylate         | NULL        | NULL        | 176.03638 | 243.196  |
| M432T471 | Gentamicin  | Xenobiotic | Neomycin,          | NULL        | NULL        | 432.27744 | 470.7575 |
| M201T109 | D-Erythro   | Carbohydr  | Pentose ph         | Organooxy   | Carbohydr   | 201.01555 | 109.419  |
| M784T372 | FAD         | Cofactors  | Riboflavin         | Flavin nuc  | NULL        | 784.14364 | 372.2045 |
| M195T415 | Gulonic ac  | Carbohydr  | Pentose an         | Hydroxy a   | Medium-cl   | 195.04901 | 414.958  |
| M195T82  | Gluconic a  | Carbohydr  | Pentose ph         | Organooxy   | Carbohydr   | 195.04997 | 81.6021  |
| M103T248 | (R)-3-Hydr  | Carbohydr  | Butanoate          | Hydroxy a   | Beta hydro  | 103.03891 | 247.61   |

|          |              |            |             |                       |             |           |          |
|----------|--------------|------------|-------------|-----------------------|-------------|-----------|----------|
| M103T88  | Malonate     | Lipid      | Fatty acid  | NULL                  | NULL        | 102.95566 | 87.8926  |
| M249T88  | _gamma-Gl    | Peptide    | Gamma-gl    | Carboxylic Amino aci  |             | 248.96007 | 88.0207  |
| M122T289 | Nicotinic    | αCofactors | αNicotinate | Pyridines             | αPyridineca | 122.02315 | 288.6845 |
| M167T126 | Uric acid    | Nucleotide | Purine met  | Imidazopy             | Purines an  | 167.01962 | 125.719  |
| M89T788  | beta-Alani   | Amino aci  | beta-Alani  | Carboxylic Amino aci  |             | 89.022916 | 787.656  |
| M93T664  | Dimethyl s   | Energy     | Sulfur met  | Sulfonyls             | Sulfones    | 92.926226 | 663.7645 |
| M117T44  | Guanidoac    | Amino aci  | Arginine α  | Carboxylic Amino aci  |             | 116.92713 | 43.77265 |
| M191T803 | 5-Hydroxy    | Amino aci  | Tryptopha   | Indoles an            | Indolyl car | 191.10696 | 802.7255 |
| M346T179 | dGMP         | Nucleotide | Purine met  | Purine nuc            | Purine deo  | 346.05588 | 179.387  |
| M117T422 | Methylmal    | Amino aci  | Valine, leu | Carboxylic Dicarboxyl |             | 117.01803 | 421.856  |
| M130T671 | L-Isoleucin  | Amino aci  | Valine, leu | Carboxylic Amino aci  |             | 130.08659 | 671.059  |
| M164T330 | L-Phenylal   | Amino aci  | Phenylalan  | Carboxylic Amino aci  |             | 164.06964 | 329.818  |
| M135T200 | Hypoxanth    | Nucleotide | Purine met  | Imidazopy             | Purines an  | 135.03045 | 200.335  |
| M179T88  | D-Galacto    | Carbohydr  | Galactose   | NULL                  | NULL        | 179.0543  | 88.35905 |
| M117T237 | Succinic ac  | Carbohydr  | Citrate cyc | Carboxylic Dicarboxyl |             | 117.01783 | 236.645  |
| M116T67  | 5-Aminope    | Amino aci  | Lysine deg  | Carboxylic Amino aci  |             | 116.06977 | 67.2758  |
| M426T130 | ADP          | Nucleotide | Purine met  | Purine nuc            | Purine ribe | 426.0226  | 129.689  |
| M339T68  | _Fructose 1, | Energy     | Methane n   | Organooxy             | Carbohydr   | 338.98837 | 67.84745 |
| M120T742 | Phenylacet   | Amino aci  | Phenylalan  | Benzene α             | Phenylacet  | 119.94583 | 741.9325 |
| M121T599 | Erythritol   | Xenobiotic | Sugar, sug  | NULL                  | NULL        | 121.02766 | 599.023  |
| M203T380 | L-Tryptopl   | Amino aci  | Tryptopha   | Indoles an            | Indolyl car | 203.08152 | 379.8515 |
| M113T136 | Creatinine   | Amino aci  | Arginine α  | Carboxylic Amino aci  |             | 112.98408 | 135.85   |
| M151T94  | _D-Arabitol  | Carbohydr  | Pentose an  | Organooxy             | Carbohydr   | 151.05947 | 94.2116  |
| M101T341 | Ethylmeth    | Lipid      | Branched c  | Fatty Acyl            | Fatty acids | 101.02264 | 340.916  |
| M181T92  | Sorbitol     | Carbohydr  | Fructose α  | Organooxy             | Carbohydr   | 181.07008 | 92.3514  |
| M105T137 | Glyceric ac  | Carbohydr  | Glyoxylate  | Organooxy             | Carbohydr   | 105.0178  | 136.925  |
| M87T309  | Pyruvic aci  | Carbohydr  | Pyruvate n  | Keto acids            | Alpha-ketc  | 87.007261 | 308.976  |
| M191T70  | Citric acid  | Carbohydr  | Citrate cyc | Carboxylic Tricarboxy |             | 191.01862 | 69.9117  |
| M269T806 | Dehydroep    | Lipid      | Steroid hor | Steroids an           | Androstan   | 269.21242 | 806.364  |
| M242T564 | Thymidine    | Nucleotide | Pyrimidine  | Pyrimidine            | Pyrimidine  | 242.17602 | 564.4855 |
| M151T537 | D-Xylitol    | Carbohydr  | Pentose an  | Organooxy             | Carbohydr   | 151.05963 | 536.54   |
| M116T674 | L-Valine     | Amino aci  | Valine, leu | Carboxylic Amino aci  |             | 116.06969 | 674.104  |
| M271T832 | 17α-Estrad   | Lipid      | Steroid hor | Steroids an           | Estrane ste | 271.22797 | 832.421  |
| M121T413 | Phenylethy   | Amino aci  | Phenylalan  | Benzene α             | Phenethylc  | 121.02758 | 412.502  |
| M133T112 | L-Malic ac   | Carbohydr  | Citrate cyc | Hydroxy α             | Beta hydroc | 133.01273 | 112.266  |
| M159T97  | Oxadipic     | Amino aci  | Lysine bios | Keto acids            | Medium-cl   | 158.97736 | 96.6367  |
| M140T80  | O-Phospho    | Lipid      | Glyceroph   | Organic pl            | Phosphate   | 140.01053 | 80.0469  |
| M113T364 | Oxalacetic   | Carbohydr  | Citrate cyc | Keto acids            | Short-chain | 112.98488 | 363.8565 |
| M383T325 | S-Adenosyl   | Amino aci  | Cysteine α  | 5'-deoxyrib           | 5'-deoxy-5' | 383.11419 | 325.334  |
| M115T77  | Fumaric α    | Carbohydr  | Citrate cyc | Carboxylic Dicarboxyl |             | 115.00197 | 77.07055 |

|          |                     |              |                     |                       |                    |           |           |
|----------|---------------------|--------------|---------------------|-----------------------|--------------------|-----------|-----------|
| M243T95  | Cytidine            | Nucleotide   | Pyrimidine          | NULL                  | NULL               | 242.94321 | 94.9789   |
| M144T188 | Spermidine          | Amino acid   | Arginine            | amino                 | Organonitrogen     | 143.91483 | 188.056   |
| M191T79  | Quinate             | Amino acid   | Phenylalanine       | NULL                  | NULL               | 191.05533 | 79.36225  |
| M309T799 | Ribose 1,5-         | Carbohydrate | Pentose             | phosphate             | Organooxygen       | 309.17367 | 799.409   |
| M151T415 | Ribitol             | Carbohydrate | Pentose             | anhydride             | Organooxygen       | 151.05958 | 414.595   |
| M194T820 | Methyl betaine      | Unknown      | Unknown             | NULL                  | NULL               | 194.08151 | 819.918   |
| M152T706 | 3-Hydroxy           | Amino acid   | Tryptophan          | Benzene               | amino              | 152.03486 | 706.008   |
| M137T105 | Urocanic acid       | Amino acid   | Histidine           | nucleoside            | Imidazoles         | 137.03445 | 104.624   |
| M137T470 | 4-Hydroxy           | Xenobiotic   | Benzoate            | benzene               | amino              | 137.02359 | 469.627   |
| M118T431 | L-Homoserine        | Amino acid   | Glycine, serine     | Carboxylic Amino acid |                    | 117.92724 | 430.869   |
| M139T78  | Phosphonic acid     | Amino acid   | Phosphonic acid     | Organic phosphorus    | Organic phosphorus | 138.97881 | 77.87915  |
| M402T73  | CDP                 | Nucleotide   | Pyrimidine          | Pyrimidine            | Pyrimidine         | 402.01122 | 73.3035   |
| M119T413 | 3-Methylthio        | Energy       | Sulfur metabolism   | Fatty Acyl            | Fatty acids        | 119.05199 | 413.484   |
| M115T191 | Maleamate           | Cofactors    | Nicotinate          | NULL                  | NULL               | 115.00222 | 191.373   |
| M225T100 | Carnosine           | Peptide      | Dipeptide           | Peptidomimetic        | Hybrid peptide     | 225.09856 | 100.32615 |
| M361T666 | Cortisol            | Lipid        | Steroid hormone     | Steroids              | anhydride          | 361.20753 | 666.053   |
| M266T325 | Deoxyguanosine      | Nucleotide   | Purine              | metabolite            | Purine nucleoside  | 266.08954 | 324.714   |
| M441T823 | Folic acid          | Cofactors    | Folate biosynthesis | Carboxylic Amino acid |                    | 441.25183 | 822.912   |
| M401T549 | 25-Hydroxy          | Lipid        | Primary bile        | Steroids              | anhydride          | 401.08789 | 549.326   |
| M279T779 | Bovine              | Lipid        | Linoleic acid       | Fatty Acyl            | Lineolic acid      | 279.23289 | 779.01    |
| M229T78  | D-Ribose 5-         | Carbohydrate | Pentose             | phosphate             | Organooxygen       | 229.01152 | 78.0157   |
| M289T77  | Sedoheptulose       | Carbohydrate | Pentose             | phosphate             | NULL               | 289.03305 | 77.0406   |
| M179T331 | Alpha-D-C           | Carbohydrate | Glycolysis          | Organooxygen          | Carbohydrate       | 179.05468 | 330.556   |
| M606T84_ | Uridine diphosphate | Carbohydrate | Amino sugar         | Pyrimidine            | Pyrimidine         | 606.06734 | 83.58305  |
| M177T194 | Gluconolactone      | Carbohydrate | Pentose             | phosphate             | Organooxygen       | 177.03956 | 194.089   |
| M103T550 | 3R-hydroxy          | Carbohydrate | Butanoate           | NULL                  | NULL               | 103.03891 | 549.806   |
| M185T75  | (2R)-2-Hydroxy      | Carbohydrate | Glycolysis          | Carbohydrate          | Sugar acid         | 184.98484 | 74.52915  |
| M303T836 | Arachidonic         | Lipid        | Arachidonic         | Fatty Acyl            | Fatty acids        | 303.23292 | 835.6505  |
| M179T344 | L-Gulose            | Cofactors    | Ascorbate           | Organooxygen          | Carbohydrate       | 179.05515 | 343.7705  |
| M329T830 | Docosapentaenoic    | Lipid        | Biosynthesis        | Fatty Acyl            | Fatty acids        | 329.24742 | 829.524   |
| M319T77  | AICAR               | Nucleotide   | Purine              | metabolite            | Imidazole          | 319.04267 | 76.5448   |
| M283T312 | Xanthosine          | Nucleotide   | Purine              | metabolite            | Purine nucleoside  | 283.06832 | 312.2395  |
| M186T366 | 8-Amino-7-          | Cofactors    | Biotin              | metabolite            | NULL               | 186.11269 | 366.2665  |
| M362T101 | GMP                 | Nucleotide   | Purine              | metabolite            | Purine nucleoside  | 362.04973 | 101.0195  |
| M177T310 | 2-Dehydro           | Carbohydrate | Pentose             | phosphate             | NULL               | 177.03924 | 309.829   |
| M403T78  | UDP                 | Nucleotide   | Pyrimidine          | Pyrimidine            | Pyrimidine         | 402.99543 | 77.76795  |
| M131T226 | L-Ribulose          | Carbohydrate | Pentose             | anhydride             | Organooxygen       | 131.03367 | 226.0095  |
| M565T80_ | Uridine diphosphate | Carbohydrate | Starch              | and                   | Pyrimidine         | 565.04347 | 79.8363   |
| M211T82  | Ribose 1-phosphate  | Carbohydrate | Pentose             | phosphate             | Organooxygen       | 211.00071 | 81.57155  |
| M295T836 | 9,10-Epoxy          | Lipid        | Linoleic acid       | Fatty Acyl            | Fatty acids        | 295.22736 | 835.692   |



|          |              |             |                     |             |             |           |          |
|----------|--------------|-------------|---------------------|-------------|-------------|-----------|----------|
| M177T259 | L-Gulonic    | Cofactors c | Ascorbate           | NULL        | NULL        | 177.03953 | 258.666  |
| M327T834 | Docosahex    | Lipid       | Biosynthes          | Fatty Acyls | Fatty acids | 327.23201 | 834.09   |
| M151T362 | L-Arabitol   | Carbohydr   | Pentose an          | Organooxy   | Carbohydr   | 151.05961 | 361.579  |
| M193T540 | D-Galactu    | Carbohydr   | Pentose an          | NULL        | NULL        | 193.03433 | 540.139  |
| M182T362 | 4-Pyridoxic  | Cofactors c | Vitamin B           | Pyridines a | Pyridineca  | 182.0443  | 361.885  |
| M227T450 | Traumatic    | Lipid       | alpha-Linc          | NULL        | NULL        | 227.1286  | 450.29   |
| M175T313 | 2-Keto-D-ç   | Carbohydr   | Pentose ph          | NULL        | NULL        | 175.02375 | 312.756  |
| M243T78  | Fucose 1-p   | Carbohydr   | Fructose a          | Organooxy   | Carbohydr   | 243.0271  | 77.87915 |
| M766T310 | Coenzyme     | Cofactors c | Pantothen           | Purine nuc  | Purine ribc | 766.11851 | 309.898  |
| M241T575 | Lumichron    | Cofactors c | Riboflavin          | NULL        | NULL        | 241.07307 | 575.3325 |
| M664T300 | NADH         | Cofactors c | Nicotinate (5'->5') | -din        | NULL        | 664.1263  | 299.717  |
| M179T159 | D-Mannos     | Carbohydr   | Fructose a          | Organooxy   | Carbohydr   | 179.056   | 159.43   |
| M686T340 | Dephosph     | Cofactors c | Pantothen           | Purine nuc  | Purine ribc | 686.1519  | 340.499  |
| M662T212 | NAD          | Cofactors c | Nicotinate (5'->5') | -din        | NULL        | 662.10113 | 212.141  |
| M136T575 | 2-Aminobe    | Amino aci   | Tryptopha           | Benzene a   | Benzoic ac  | 136.03951 | 575.354  |
| M371T70  | Phosphoril   | Carbohydr   | Pentose ph          | Organooxy   | Carbohydr   | 370.93237 | 70.3717  |
| M239T88  | O-Acetylca   | Lipid       | Carnitine r         | NULL        | NULL        | 238.93078 | 87.9269  |
| M131T710 | D-Xylose     | Carbohydr   | Pentose an          | Organooxy   | Carbohydr   | 131.03323 | 709.815  |
| M239T745 | L-Cystine    | Amino aci   | Cysteine a          | Carboxylic  | Amino aci   | 239.12881 | 745.3665 |
| M142T135 | Aminoadiç    | Amino aci   | Lysine bios         | Carboxylic  | Amino aci   | 142.04906 | 135.022  |
| M191T42  | Isocitric ac | Carbohydr   | Citrate cyc         | Carboxylic  | Tricarboxy  | 191.0188  | 42.268   |
| M171T88  | 4-Bromopl    | Xenobiotic  | Metabolism          | Phenols     | Halophenc   | 170.94315 | 87.89405 |
| M171T78  | rac-Glycer   | Lipid       | Glyceroph           | NULL        | NULL        | 171.00527 | 78.28265 |
| M179T605 | D-Glucose    | Carbohydr   | Glycolysis          | Organooxy   | Carbohydr   | 179.05604 | 604.557  |
| M273T72  | 1-Phospho    | Carbohydr   | Amino sug           | NULL        | NULL        | 273.0022  | 71.58955 |
| M324T81  | N-Glycolyl   | Carbohydr   | Amino sug           | Organooxy   | Carbohydr   | 324.09293 | 81.3775  |
| M579T77_ | Uridine diç  | Carbohydr   | Amino sug           | Pyrimidine  | Pyrimidine  | 579.02452 | 76.8563  |
| M130T256 | N-Acetyl-b   | Amino aci   | beta-Alani          | Carboxylic  | Carboxylic  | 130.04964 | 256.233  |
| M165T677 | Phthalate    | Xenobiotic  | Polycyclic c        | NULL        | NULL        | 165.01768 | 677.009  |
| M179T505 | L-Sorbose    | Carbohydr   | Fructose a          | NULL        | NULL        | 179.05471 | 505.412  |
| M97T176  | Hydrogen j   | Energy      | Oxidative j         | Non-metal   | Non-metal   | 96.968242 | 175.776  |
| M115T245 | alpha-Ket    | Amino aci   | Leucine, Is         | Keto acids  | Short-chain | 115.03895 | 244.707  |
| M193T408 | D-Glucuro    | Carbohydr   | Pentose an          | Organooxy   | Carbohydr   | 193.03337 | 407.5205 |
| M274T330 | N-Acetylm    | Carbohydr   | Amino sug           | Organooxy   | Carbohydr   | 274.0934  | 329.849  |
| M151T224 | 4-Hydroxyj   | Amino aci   | Tyrosine r          | Phenols     | 1-hydroxy-  | 151.03837 | 223.696  |
| M165T211 | 3-(2-hydro   | Xenobiotic  | Polycyclic c        | Carboxylic  | Carboxylic  | 165.05448 | 211.475  |
| M210T185 | 1,3,7-Trim   | Xenobiotic  | Caffeine m          | Imidazopy   | Purines an  | 210.07652 | 184.569  |
| M313T767 | 9,10-DHO     | Lipid       | Linoleic ac         | Fatty Acyls | Fatty acids | 313.23873 | 766.902  |
| M243T136 | Pseudouric   | Nucleotide  | Pyrimidine          | Nucleoside  | NULL        | 243.06237 | 135.9895 |
| M122T505 | Picolinic a  | Amino aci   | Tryptopha           | Pyridines a | Pyridineca  | 122.02291 | 505.412  |

|          |             |            |             |            |             |           |          |
|----------|-------------|------------|-------------|------------|-------------|-----------|----------|
| M135T81  | Threonate   | Cofactors  | αAscorbate  | Organooxy  | Carbohydr   | 135.02833 | 81.4484  |
| M138T613 | 6-Hydroxy   | Cofactors  | αNicotinate | Pyridines  | αPyridineca | 138.01899 | 613.1345 |
| M295T33  | 12,13-DH    | Lipid      | Linoleic ac | Fatty Acyl | Fatty acids | 295.22799 | 32.5965  |
| M258T80  | D-Glucosa   | Carbohydr  | Amino sug   | Organooxy  | Carbohydr   | 258.03776 | 79.8363  |
| M165T411 | Phenyl lact | Amino aci  | Phenylalan  | Phenylpro  | NULL        | 165.05445 | 411.492  |
| M195T149 | 3,7-Dimet   | Xenobiotic | Caffeine    | mImidazopy | Purines an  | 195.0499  | 149.372  |
| M144T730 | 4-Acetami   | Amino aci  | Arginine α  | Carboxylic | Amino aci   | 144.06529 | 730.455  |

| exact_mas | ppm       | formula  | mode               | identify.pv | library  | KEGG   | hmdb    |
|-----------|-----------|----------|--------------------|-------------|----------|--------|---------|
| 363.058   | 1.4945122 | C10H14N5 | [M+H] <sup>+</sup> | 2.35E-06    | MetaDNA  | C06193 | NULL    |
| 446.0604  | 6.7947207 | C11H20N4 | [M+H] <sup>+</sup> | 2.83E-06    | MetaDNA  | C00570 | HMDB000 |
| 265.1123  | 14.82003  | C12H17N4 | [M+H] <sup>+</sup> | 0.0026902   | MetaDNA  | C00378 | HMDB000 |
| 155.0347  | 5.805152  | C3H10NO  | [M] <sup>-</sup>   | 0.0003372   | MetaDNA  | C01210 | HMDB006 |
| 134.0215  | 13.551557 | C4H6O5   | [M] <sup>-</sup>   | 0.0004504   | MetaDNA  | C03064 | NULL    |
| 358.0964  | 0.126579  | C11H23N2 | [M-H] <sup>-</sup> | 4.76E-05    | MetaDNA  | C01134 | HMDB000 |
| 108.0575  | 2.3041353 | C7H8O    | [M+H] <sup>+</sup> | 4.13E-05    | BioDeepD | C01468 | HMDB000 |
| 146.0215  | 3.1530176 | C5H6O5   | [M+H-H2O]          | 1.69E-05    | BioDeepD | C00026 | HMDB000 |
| 131.0695  | 3.0329072 | C4H9N3O  | [M+H] <sup>+</sup> | 1.05E-27    | BioDeepD | C00300 | HMDB000 |
| 103.0633  | 4.393829  | C4H9NO2  | [M+H] <sup>+</sup> | 2.24E-06    | BioDeepD | C00334 | HMDB000 |
| 131.0946  | 4.4753539 | C6H13NO  | [M+H] <sup>+</sup> | 3.17E-25    | BioDeepD | C00123 | HMDB000 |
| 152.0334  | 1.9837903 | C5H4N4O  | [M+H] <sup>+</sup> | 2.84E-31    | BioDeepD | C00385 | HMDB000 |
| 111.032   | 0.8672632 | C5H5NO2  | [M] <sup>+</sup>   | 1.33E-09    | BioDeepD | C05942 | HMDB000 |
| 154.0266  | 3.9629614 | C7H6O4   | [M+H] <sup>+</sup> | 2.00E-11    | BioDeepD | C00628 | HMDB000 |
| 172.0372  | 4.8492485 | C7H8O5   | [M] <sup>+</sup>   | 1.06E-23    | BioDeepD | C02637 | NULL    |
| 158.0328  | 7.0241415 | C5H6N2O  | [M+H] <sup>+</sup> | 1.69E-07    | BioDeepD | C00337 | HMDB000 |
| 307.0838  | 0.3663822 | C10H17N3 | [M] <sup>+</sup>   | 2.15E-32    | BioDeepD | C00051 | NULL    |
| 90.0317   | 0.2661413 | C3H6O3   | [M+H] <sup>+</sup> | 4.40E-16    | BioDeepD | C00256 | HMDB000 |
| 181.0739  | 1.7409848 | C9H11NO  | [M+H] <sup>+</sup> | 5.66E-24    | BioDeepD | C00082 | HMDB000 |
| 282.2559  | 0.0958149 | C18H34O2 | [M] <sup>+</sup>   | 7.59E-40    | BioDeepD | C00712 | HMDB000 |
| 149.051   | 9.6074195 | C5H11NO  | [M+H] <sup>+</sup> | 9.82E-08    | BioDeepD | C00073 | HMDB000 |
| 147.0532  | 0.2066533 | C5H9NO4  | [M+H] <sup>+</sup> | 2.32E-26    | BioDeepD | C00025 | HMDB000 |
| 115.0633  | 1.7696161 | C5H9NO2  | [M+H] <sup>+</sup> | 5.45E-17    | BioDeepD | C00148 | HMDB000 |
| 117.079   | 6.4580265 | C5H11NO  | [M+H] <sup>+</sup> | 1.58E-15    | BioDeepD | C00719 | HMDB000 |
| 267.0968  | 1.8094146 | C10H13N5 | [M+H] <sup>+</sup> | 2.51E-28    | BioDeepD | C00212 | HMDB000 |
| 126.0429  | 5.6960624 | C5H6N2O  | [M] <sup>+</sup>   | 0.0001646   | BioDeepD | C00178 | HMDB000 |
| 102.0317  | 2.0518169 | C4H6O3   | [M] <sup>+</sup>   | 1.24E-07    | BioDeepD | C00109 | HMDB000 |
| 130.063   | 0.447371  | C6H10O3  | [M] <sup>+</sup>   | 1.41E-07    | BioDeepD | C00233 | HMDB000 |
| 256.2402  | 1.1869878 | C16H32O2 | [M] <sup>+</sup>   | 1.68E-13    | BioDeepD | C00249 | HMDB000 |
| 148.0524  | 0.803122  | C9H8O2   | [M] <sup>+</sup>   | 2.47E-08    | BioDeepD | C00423 | NULL    |
| 116.011   | 5.9266708 | C4H4O4   | [M+H-H2O]          | 2.86E-08    | BioDeepD | C01384 | NULL    |
| 112.0273  | 0.0472222 | C4H4N2O  | [M+H] <sup>+</sup> | 7.55E-08    | BioDeepD | C00106 | HMDB000 |
| 148.0372  | 6.4112471 | C5H8O5   | [M+H] <sup>+</sup> | 3.39E-18    | BioDeepD | C03196 | HMDB000 |
| 167.0219  | 3.2640431 | C7H5NO4  | [M] <sup>+</sup>   | 7.50E-10    | BioDeepD | C03722 | HMDB000 |
| 268.0808  | 2.3215501 | C10H12N4 | [M+H] <sup>+</sup> | 3.99E-10    | BioDeepD | C00294 | HMDB000 |
| 198.0528  | 0.0115492 | C9H10O5  | [M+H] <sup>+</sup> | 2.99E-05    | BioDeepD | C05584 | HMDB000 |
| 180.0634  | 3.1387835 | C6H12O6  | [M+H] <sup>+</sup> | 1.02E-14    | BioDeepD | C00795 | HMDB000 |
| 164.0473  | 1.0845931 | C9H8O3   | [M+H-H2O]          | 8.15E-08    | BioDeepD | C00811 | HMDB000 |
| 297.0896  | 3.1087306 | C11H15N5 | [M+H] <sup>+</sup> | 2.25E-29    | BioDeepD | C00170 | HMDB000 |

|          |           |                             |           |                 |         |
|----------|-----------|-----------------------------|-----------|-----------------|---------|
| 193.0739 | 9.7428631 | C10H11NC [M+H] <sup>+</sup> | 0.0334552 | BioDeepD C05598 | HMDB000 |
| 161.1052 | 0.823963  | C7H15NO [M+H] <sup>+</sup>  | 8.18E-44  | BioDeepD C00318 | HMDB000 |
| 228.0746 | 0.6004915 | C9H12N2C [M] <sup>+</sup>   | 1.18E-11  | BioDeepD C00526 | HMDB000 |
| 301.2981 | 0.0632755 | C18H39NC [M+H] <sup>+</sup> | 3.38E-17  | BioDeepD C00836 | HMDB000 |
| 146.1055 | 2.8746736 | C6H14N2C [M+H] <sup>+</sup> | 5.61E-28  | BioDeepD C00047 | HMDB000 |
| 338.3185 | 0.2511949 | C22H42O2 [M] <sup>+</sup>   | 1.28E-11  | BioDeepD C08316 | HMDB000 |
| 242.261  | 2.7254851 | C16H34O [M+H] <sup>+</sup>  | 4.29E-06  | BioDeepD C00823 | HMDB000 |
| 175.0957 | 2.7880803 | C6H13N3C [M-H] <sup>-</sup> | 8.98E-09  | BioDeepD C00327 | HMDB000 |
| 178.0477 | 4.1666022 | C6H10O6 [M+H] <sup>+</sup>  | 2.05E-07  | BioDeepD C01040 | HMDB000 |
| 156.0687 | 1.9530158 | C10H8N2 [M] <sup>+</sup>    | 2.72E-05  | BioDeepD C02938 | HMDB000 |
| 133.0375 | 3.8653071 | C4H7NO4 [M-H] <sup>-</sup>  | 6.67E-27  | BioDeepD C00049 | HMDB000 |
| 182.0579 | 6.9007086 | C9H10O4 [M+H] <sup>+</sup>  | 9.16E-20  | BioDeepD C05582 | HMDB000 |
| 169.0739 | 6.443723  | C8H11NO [M+H] <sup>+</sup>  | 6.49E-14  | BioDeepD C00547 | HMDB000 |
| 376.1383 | 6.3208388 | C17H20N4 [M] <sup>+</sup>   | 7.09E-06  | BioDeepD C00255 | HMDB000 |
| 176.0321 | 3.5092297 | C6H8O6 [M+H] <sup>+</sup>   | 3.44E-18  | BioDeepD C00072 | NULL    |
| 88.0524  | 0.017755  | C4H8O2 [M] <sup>+</sup>     | 0.0002381 | BioDeepD C00246 | HMDB000 |
| 169.0739 | 6.2298043 | C8H11NO [M+H] <sup>+</sup>  | 1.27E-05  | BioDeepD C00314 | HMDB000 |
| 150.0528 | 3.1865263 | C5H10O5 [M+H] <sup>+</sup>  | 9.54E-06  | BioDeepD C00121 | HMDB000 |
| 122.0368 | 0.3024763 | C7H6O2 [M] <sup>+</sup>     | 3.98E-05  | BioDeepD C00180 | NULL    |
| 228.2089 | 1.1751856 | C14H28O2 [M+H] <sup>+</sup> | 9.37E-07  | BioDeepD C06424 | HMDB000 |
| 125.0147 | 2.2819396 | C2H7NO3 [M-H] <sup>-</sup>  | 2.13E-06  | BioDeepD C00245 | HMDB000 |
| 348.0471 | 4.5205196 | C10H13N4 [M+H] <sup>+</sup> | 4.18E-25  | BioDeepD C00130 | HMDB000 |
| 200.1776 | 0.0158604 | C12H24O2 [M] <sup>+</sup>   | 1.74E-08  | BioDeepD C02679 | HMDB000 |
| 283.0917 | 0.7678546 | C10H13N5 [M-H] <sup>-</sup> | 7.43E-22  | BioDeepD C00387 | HMDB000 |
| 169.998  | 4.489938  | C3H7O6P [M+H] <sup>+</sup>  | 1.84E-07  | BioDeepD C00111 | HMDB000 |
| 323.0519 | 2.097429  | C9H14N3C [M+H] <sup>+</sup> | 8.78E-29  | BioDeepD C00055 | HMDB000 |
| 119.0582 | 1.1330536 | C4H9NO3 [M-H] <sup>-</sup>  | 9.11E-37  | BioDeepD C00188 | HMDB000 |
| 132.0423 | 0.2479948 | C5H8O4 [M] <sup>+</sup>     | 7.89E-26  | BioDeepD C00489 | HMDB000 |
| 110.0368 | 0.5575998 | C6H6O2 [M] <sup>+</sup>     | 4.46E-06  | BioDeepD C00530 | HMDB000 |
| 392.2927 | 6.5974274 | C24H40O4 [M+H] <sup>+</sup> | 3.78E-06  | BioDeepD C04483 | HMDB000 |
| 300.2089 | 1.8809674 | C20H28O2 [M] <sup>+</sup>   | 3.38E-10  | BioDeepD C00777 | HMDB000 |
| 386.3549 | 5.5285101 | C27H46O [M+H] <sup>+</sup>  | 1.19E-06  | BioDeepD C00187 | HMDB000 |
| 226.0954 | 4.0381943 | C10H14N2 [M] <sup>+</sup>   | 2.16E-08  | BioDeepD C00931 | HMDB000 |
| 334.0566 | 3.3507767 | C11H15N2 [M+H] <sup>+</sup> | 4.89E-11  | BioDeepD C00455 | HMDB000 |
| 114.0429 | 3.4224245 | C4H6N2O [M+H] <sup>+</sup>  | 3.82E-08  | BioDeepD C00429 | HMDB000 |
| 111.0433 | 0.8924533 | C4H5N3O [M+H] <sup>+</sup>  | 1.85E-13  | BioDeepD C00380 | HMDB000 |
| 155.0695 | 0.6791534 | C6H9N3O [M+H] <sup>+</sup>  | 1.82E-41  | BioDeepD C00135 | HMDB000 |
| 105.0426 | 0.0273456 | C3H7NO3 [M+H] <sup>+</sup>  | 3.16E-05  | BioDeepD C00065 | HMDB000 |
| 184.037  | 2.2649686 | C8H8O5 [M+H] <sup>+</sup>   | 1.24E-07  | BioDeepD C05580 | HMDB000 |
| 132.0535 | 1.0604188 | C4H8N2O [M+H] <sup>+</sup>  | 3.80E-27  | BioDeepD C00152 | HMDB000 |

|           |           |          |        |           |                 |         |
|-----------|-----------|----------|--------|-----------|-----------------|---------|
| 86.0368   | 0.8788137 | C4H6O2   | [M]+   | 6.15E-05  | BioDeepD C00741 | HMDB000 |
| 102.0681  | 1.187104  | C5H10O2  | [M]+   | 7.77E-07  | BioDeepD C08262 | HMDB000 |
| 174.1117  | 2.0525534 | C6H14N4C | [M+H]+ | 3.17E-27  | BioDeepD C00062 | HMDB000 |
| 138.0317  | 10.201935 | C7H6O3   | [M-H]- | 8.36E-16  | BioDeepD C00805 | HMDB000 |
| 218.1055  | 3.0798091 | C12H14N2 | [M]+   | 0.0006132 | BioDeepD C00978 | HMDB000 |
| 312.3028  | 0.1275223 | C20H40O2 | [M]+   | 1.85E-05  | BioDeepD C06425 | HMDB000 |
| 612.152   | 7.9314829 | C20H32N6 | [M+H]+ | 1.19E-16  | BioDeepD C00127 | HMDB000 |
| 219.1107  | 1.7706681 | C9H17NO  | [M+H]+ | 1.89E-29  | BioDeepD C00864 | HMDB000 |
| 125.0242  | 3.2312231 | C2H8NO3  | [M+H]+ | 0.0005119 | BioDeepD C03557 | HMDB001 |
| 109.0528  | 0.7468654 | C6H7NO   | [M+H]+ | 1.12E-06  | BioDeepD C01987 | NULL    |
| 102.0317  | 3.0501453 | C4H6O3   | [M]+   | 1.29E-05  | BioDeepD C00232 | HMDB000 |
| 208.0848  | 11.992767 | C10H12N2 | [M]+   | 4.26E-05  | BioDeepD C00328 | HMDB000 |
| 346.2144  | 2.3432793 | C21H30O4 | [M]+   | 6.08E-08  | BioDeepD C05488 | HMDB000 |
| 280.2402  | 2.1305125 | C18H32O2 | [M+H]+ | 1.41E-19  | BioDeepD C01595 | HMDB000 |
| 138.0317  | 0.6010571 | C7H6O3   | [M-H]- | 7.69E-25  | BioDeepD C00587 | HMDB000 |
| 194.043   | 0.8397399 | C6H10O7  | [M+H]+ | 7.15E-05  | BioDeepD C00191 | NULL    |
| 94.0419   | 2.0645355 | C6H6O    | [M]+   | 3.51E-05  | BioDeepD C00146 | NULL    |
| 101.0477  | 0.1062458 | C4H7NO2  | [M+H]+ | 2.05E-06  | BioDeepD C01234 | HMDB003 |
| 121.0197  | 1.5385662 | C3H7NO2  | [M]+   | 6.53E-14  | BioDeepD C00097 | HMDB000 |
| 398.1372  | 8.2384382 | C15H22N6 | [M+H]+ | 9.99E-18  | BioDeepD C00019 | HMDB000 |
| 131.0582  | 0.4399335 | C5H9NO3  | [M+H]+ | 2.90E-08  | BioDeepD C03440 | HMDB006 |
| 221.0899  | 2.4516356 | C8H15NO  | [M+H]+ | 3.88E-07  | BioDeepD C00140 | HMDB000 |
| 150.0528  | 0.1258627 | C5H10O5  | [M+H]+ | 3.15E-05  | BioDeepD C00259 | HMDB000 |
| 174.0793  | 0.8276767 | C10H10N2 | [M+H]+ | 0.0208432 | BioDeepD C02693 | HMDB002 |
| 170.0579  | 9.9982594 | C8H10O4  | [M]+   | 0.0007836 | BioDeepD C05576 | HMDB000 |
| 180.0423  | 0.2595054 | C9H8O4   | [M+H]+ | 0.0243477 | BioDeepD C01179 | HMDB000 |
| 302.22458 | 1.1692409 | C20H30O2 | [M-H]- | 9.75E-06  | BioDeepD C06428 | HMDB019 |
| 182.079   | 3.6913806 | C6H14O6  | [M+H]+ | 1.08E-14  | BioDeepD C00392 | HMDB000 |
| 137.0841  | 1.5989438 | C8H11NO  | [M+H]+ | 0.0020351 | BioDeepD C00483 | HMDB000 |
| 136.0524  | 0.0101991 | C8H8O2   | [M+H]+ | 6.60E-10  | BioDeepD C07086 | HMDB000 |
| 276.0246  | 3.6857439 | C6H13O1C | [M+H]+ | 7.57E-10  | BioDeepD C00345 | HMDB000 |
| 247.0246  | 3.174602  | C8H10NO  | [M+H]+ | 3.57E-17  | BioDeepD C00018 | HMDB000 |
| 342.1162  | 1.0077408 | C12H22O1 | [M-H]- | 5.00E-19  | BioDeepD C00185 | NULL    |
| 88.1      | 8.2567346 | C4H12N2  | [M+H]+ | 0.0014695 | BioDeepD C00134 | NULL    |
| 251.102   | 1.6538255 | C10H13N5 | [M+H]+ | 3.03E-12  | BioDeepD C00559 | HMDB000 |
| 180.0647  | 7.6456369 | C7H8N4O  | [M+H]+ | 5.31E-14  | BioDeepD C07130 | HMDB000 |
| 224.1412  | 0.0041069 | C13H20O3 | [M]+   | 1.26E-05  | BioDeepD C11512 | HMDB003 |
| 189.0426  | 13.591067 | C10H7NO  | [M+H]+ | 0.0028406 | BioDeepD C01717 | HMDB000 |
| 185.0089  | 1.3986419 | C3H8NO6  | [M]+   | 0.0064069 | BioDeepD C01005 | HMDB000 |
| 132.0575  | 0.5394611 | C9H8O    | [M+H]+ | 0.0038538 | BioDeepD C00903 | HMDB000 |

|          |           |                   |           |                 |         |
|----------|-----------|-------------------|-----------|-----------------|---------|
| 174.0528 | 14.743293 | C7H10O5 [M+H-H2O] | 0.002467  | BioDeepD C00493 | HMDB000 |
| 195.0743 | 10.495891 | C6H13NO [M]+      | 0.0010471 | BioDeepD C03752 | NULL    |
| 189.0637 | 1.1559108 | C7H11NO [M]+      | 1.43E-05  | BioDeepD C00624 | HMDB000 |
| 284.2715 | 1.0935989 | C18H36O2 [M]+     | 6.66E-06  | BioDeepD C01530 | HMDB000 |
| 329.0525 | 3.1676613 | C10H12N5 [M+H]+   | 3.68E-29  | BioDeepD C00575 | HMDB000 |
| 227.0906 | 5.4944809 | C9H13N3C [M]+     | 1.29E-05  | BioDeepD C00881 | HMDB000 |
| 122.048  | 1.8780213 | C6H6N2O [M+H]+    | 8.70E-19  | BioDeepD C00153 | HMDB000 |
| 299.2824 | 0.27973   | C18H37NC [M+H]+   | 2.27E-14  | BioDeepD C00319 | HMDB000 |
| 117.0578 | 2.4444206 | C8H7N [M+H]+      | 3.53E-11  | BioDeepD C00463 | HMDB000 |
| 324.0359 | 2.2332473 | C9H13N2C [M+H]+   | 3.84E-23  | BioDeepD C00105 | HMDB000 |
| 196.9955 | 9.2216729 | C5H11NO [M+H]+    | 5.59E-09  | BioDeepD C05335 | HMDB000 |
| 178.0412 | 1.1795673 | C5H10N2C [M+H]+   | 2.76E-11  | BioDeepD C01419 | HMDB000 |
| 244.0695 | 2.0405892 | C9H12N2C [M+H]+   | 6.40E-19  | BioDeepD C00299 | HMDB000 |
| 347.0631 | 3.180976  | C10H14N5 [M+H]+   | 3.35E-21  | BioDeepD C00020 | HMDB000 |
| 151.0997 | 0.2248418 | C9H13NO [M+H]+    | 8.27E-07  | BioDeepD C08300 | NULL    |
| 188.1161 | 5.4879211 | C8H16N2C [M+H]+   | 3.06E-14  | BioDeepD C02727 | HMDB000 |
| 131.0582 | 0.3074234 | C5H9NO3 [M+H]+    | 1.39E-10  | BioDeepD C00430 | HMDB000 |
| 105.079  | 0.4958225 | C4H11NO [M+H]+    | 0.0041599 | BioDeepD C06772 | HMDB000 |
| 379.2488 | 3.9720767 | C18H38NC [M+H]+   | 1.52E-09  | BioDeepD C06124 | HMDB000 |
| 162.1157 | 1.8023245 | C10H14N2 [M+H]+   | 4.68E-06  | BioDeepD C00745 | HMDB000 |
| NULL     | 12.882559 | C7H11N2C [M+H]+   | 1.52E-05  | BioDeepD C03740 | HMDB000 |
| 194.0804 | 5.1669641 | C8H10N4C [M+H]+   | 5.02E-09  | BioDeepD C07481 | HMDB000 |
| 154.0266 | 7.0723641 | C7H6O4 [M+H]+     | 0.0086354 | BioDeepD C00230 | HMDB000 |
| 132.0899 | 1.2670178 | C5H12N2C [M+H]+   | 2.15E-07  | BioDeepD C00077 | HMDB000 |
| 129.0426 | 1.2156889 | C5H7NO3 [M+H]+    | 3.63E-29  | BioDeepD C01879 | HMDB000 |
| 135.0684 | 5.8791161 | C8H9NO [M+H]+     | 1.59E-08  | BioDeepD C02505 | HMDB001 |
| 85.0891  | 3.8973359 | C5H11N [M+H]+     | 3.47E-18  | BioDeepD C01746 | HMDB003 |
| 364.042  | 2.1222931 | C10H13N4 [M-H]-   | 4.56E-09  | BioDeepD C00655 | HMDB000 |
| 309.106  | 0.1106788 | C11H19NC [M-H]-   | 2.06E-10  | BioDeepD C00270 | NULL    |
| 379.1049 | 3.9196478 | C13H21N3 [M+H]+   | 2.40E-12  | BioDeepD C03451 | HMDB000 |
| 294.1216 | 5.5764971 | C14H18N2 [M+H]+   | 1.92E-06  | BioDeepD C11045 | HMDB000 |
| 151.0494 | 1.9821596 | C5H5N5O [M+H]+    | 4.43E-18  | BioDeepD C00242 | HMDB000 |
| 250.0623 | 2.9250942 | C8H14N2C [M+H]+   | 2.84E-05  | BioDeepD C00669 | HMDB000 |
| 260.0297 | 1.3316139 | C6H13O9F [M+H]+   | 1.34E-10  | BioDeepD C00103 | HMDB000 |
| 252.0859 | 2.6493766 | C10H12N4 [M-H]-   | 1.72E-10  | BioDeepD C05512 | HMDB000 |
| 143.0405 | 4.9270442 | C6H9NOS [M]+      | 8.50E-07  | BioDeepD C04294 | HMDB003 |
| 347.0631 | 0.2120335 | C10H14N5 [M+H]+   | 5.04E-59  | BioDeepD C01367 | HMDB000 |
| 258.1106 | 0.9959956 | C8H21NO [M]+      | 3.97E-15  | BioDeepD C00670 | HMDB000 |
| 139.9875 | 2.1351952 | C2H5O5P [M]+      | 4.12E-07  | BioDeepD C00227 | HMDB000 |
| 154.0378 | 0.0121665 | C6H6N2O [M+H]+    | 0.0007795 | BioDeepD C03277 | NULL    |

|           |           |                   |           |                 |         |
|-----------|-----------|-------------------|-----------|-----------------|---------|
| 148.0194  | 11.110154 | C5H8O3S [M]+      | 0.049538  | BioDeepD C01180 | HMDB000 |
| 184.0739  | 1.5590066 | C5H15NO [M+H]+    | 5.46E-37  | BioDeepD C00588 | HMDB000 |
| 137.0715  | 3.745989  | C7H9N2O [M+H]+    | 7.17E-16  | BioDeepD C02918 | HMDB000 |
| 129.0426  | 0.4632207 | C5H7NO3 [M+H]+    | 6.41E-06  | BioDeepD C02237 | HMDB000 |
| 129.07898 | 0.2899644 | C6H11NO [M+H]+    | 8.62E-05  | BioDeepD C00408 | NULL    |
| 132.0335  | 0.6973479 | C4H5FN2C [M+H]+   | 5.52E-08  | BioDeepD C16630 | HMDB006 |
| 352.22497 | 0.306366  | C20H32O5 [M+H]+   | 2.06E-37  | BioDeepD C01312 | NULL    |
| 255.0981  | 0.5929388 | C11H15N2 [M]+     | 1.11E-18  | BioDeepD C03150 | HMDB000 |
| 137.0477  | 4.376074  | C7H7NO2 [M+H]+    | 1.82E-06  | BioDeepD C00568 | HMDB000 |
| 130.1218  | 4.0423501 | C5H14N4 [M]+      | 0.0067564 | BioDeepD C00179 | HMDB000 |
| 167.0582  | 0.2857732 | C8H9NO3 [M+H]+    | 7.13E-17  | BioDeepD C05831 | HMDB006 |
| 217.1063  | 4.476629  | C8H15N3C [M]+     | 0.0001188 | BioDeepD C15532 | HMDB000 |
| 131.1059  | 9.8845718 | C5H13N3C [M+H]+   | 9.31E-06  | BioDeepD C00436 | HMDB003 |
| 144.0575  | 0.0697077 | C10H8O [M]+       | 1.28E-07  | BioDeepD C11713 | HMDB001 |
| 312.2301  | 0.0109262 | C18H32O4 [M+H-H2C | 3.08E-40  | BioDeepD C04717 | HMDB000 |
| 264.111   | 3.7394366 | C13H16N2 [M+H]+   | 0.0040385 | BioDeepD C04148 | HMDB000 |
| 146.0579  | 2.9987611 | C6H10O4 [M]+      | 1.51E-16  | BioDeepD C00966 | NULL    |
| 136.0524  | 3.0742441 | C8H8O2 [M]+       | 4.44E-09  | BioDeepD C03765 | HMDB000 |
| 97.9674   | 1.249091  | H2SO4 [M+H]+      | 1.80E-07  | BioDeepD C00059 | HMDB000 |
| 129.0426  | 1.5101921 | C5H7NO3 [M+H]+    | 9.40E-10  | BioDeepD C01877 | NULL    |
| 399.33486 | 3.3313543 | C23H45NC [M+H]+   | 1.37E-28  | BioDeepD C02990 | NULL    |
| 193.0739  | 1.3668681 | C10H11NC [M]+     | 5.63E-19  | BioDeepD C16587 | HMDB006 |
| 296.2351  | 0.003198  | C18H32O3 [M+H-H2C | 6.70E-06  | BioDeepD C14767 | HMDB000 |
| 168.0899  | 9.2341905 | C8H12N2C [M+H]+   | 0.0012427 | BioDeepD C00534 | HMDB000 |
| 301.0563  | 10.01367  | C8H16NO [M+H-H2C  | 1.46E-15  | BioDeepD C04501 | NULL    |
| 162.1004  | 1.6037113 | C6H14N2C [M+H]+   | 1.14E-05  | BioDeepD C02627 | NULL    |
| 113.0477  | 1.508047  | C5H7NO2 [M+H]+    | 0.0006347 | BioDeepD C03564 | HMDB000 |
| 135.0545  | 5.7076631 | C5H5N5 [M-H]-     | 1.89E-22  | BioDeepD C00147 | HMDB000 |
| 104.0473  | 1.4709515 | C4H8O3 [M]+       | 1.67E-10  | BioDeepD C05984 | HMDB000 |
| 138.0317  | 1.0504714 | C7H6O3 [M+H]+     | 3.38E-06  | BioDeepD C00805 | HMDB000 |
| 166.063   | 0.4921301 | C9H10O3 [M]+      | 6.20E-13  | BioDeepD C05607 | HMDB000 |
| 142.0742  | 0.5117246 | C6H10N2C [M+H]+   | 0.0018    | BioDeepD C06231 | NULL    |
| 146.1181  | 0.2902273 | C7H16NO [M+H]+    | 1.97E-07  | BioDeepD C01996 | HMDB000 |
| 148.0372  | 11.228133 | C5H8O5 [M]+       | 3.54E-08  | BioDeepD C00684 | NULL    |
| 312.2301  | 0.6069578 | C18H32O4 [M+H]+   | 2.90E-33  | BioDeepD C14827 | HMDB000 |
| 152.0473  | 1.0545269 | C8H8O3 [M+H]+     | 2.06E-08  | BioDeepD C00642 | HMDB000 |
| 166.063   | 1.3531972 | C9H10O3 [M+H]+    | 1.23E-37  | BioDeepD C01198 | HMDB003 |
| 488.1073  | 7.3002079 | C14H26N4 [M+H]+   | 1.16E-19  | BioDeepD C00307 | HMDB000 |
| 330.21949 | 0.9738651 | C21H30O3 [M+H-H2C | 0.0015259 | BioDeepD C01176 | NULL    |
| 179.0946  | 4.4498181 | C10H13NC [M+H]+   | 4.52E-05  | BioDeepD C17235 | NULL    |

|          |           |                    |           |                 |         |
|----------|-----------|--------------------|-----------|-----------------|---------|
| 159.0895 | 12.093675 | C7H13NO [M]+       | 4.10E-06  | BioDeepD C03087 | HMDB001 |
| 104.1075 | 0.0083654 | C5H14NO [M+H]+     | 0.0002862 | BioDeepD C00114 | HMDB000 |
| 559.0717 | 5.5271066 | C15H23N5 [M+H-H2O] | 8.13E-23  | BioDeepD C00301 | HMDB000 |
| 122.0732 | 0.0032575 | C8H10O [M+H-H2O]   | 6.98E-19  | BioDeepD C05853 | HMDB003 |
| 177.9432 | 5.0741797 | H4P2O7 [M-H]-      | 1.24E-10  | BioDeepD C00013 | HMDB000 |
| 384.3392 | 0.0050532 | C27H44O [M]+       | 0.000366  | BioDeepD C05439 | HMDB000 |
| 200.0321 | 0.3754665 | C8H8O6 [M+H]+      | 1.27E-06  | BioDeepD C01061 | NULL    |
| 131.0735 | 0.2642328 | C9H9N [M+H]+       | 5.64E-07  | BioDeepD C08313 | HMDB000 |
| 294.2195 | 1.6918337 | C18H30O3 [M+H-H2O] | 3.31E-18  | BioDeepD C16326 | NULL    |
| 152.0473 | 6.3919145 | C8H8O3 [M]+        | 1.42E-05  | BioDeepD C04043 | HMDB000 |
| 166.063  | 7.516191  | C9H10O3 [M+H]+     | 3.97E-06  | BioDeepD C05581 | HMDB000 |
| 166.0477 | 2.4099793 | C5H10O6 [M+H]+     | 0.0015901 | BioDeepD C00545 | NULL    |
| 289.1274 | 1.128261  | C11H19N3 [M+H]+    | 6.53E-41  | BioDeepD C21016 | NULL    |
| 174.1004 | 0.0011011 | C7H14N2O [M+H]+    | 0.0161053 | BioDeepD C00437 | HMDB000 |
| 239.1018 | 1.1225332 | C9H13N5O [M]+      | 1.04E-16  | BioDeepD C00268 | HMDB000 |
| 334.2144 | 3.8636554 | C20H30O4 [M+H-H2O] | 9.77E-10  | BioDeepD C05949 | HMDB000 |
| 153.0426 | 0.1729862 | C7H7NO3 [M+H]+     | 1.66E-09  | BioDeepD C00632 | HMDB000 |
| 256.0821 | 2.5249512 | C11H14N2O [M]+     | 7.37E-23  | BioDeepD C05841 | HMDB000 |
| 151.0997 | 1.3937579 | C9H13NO [M+H]+     | 2.97E-05  | BioDeepD C02442 | HMDB000 |
| 169.998  | 6.1625073 | C3H7O6P [M-H]-     | 2.82E-10  | BioDeepD C00118 | NULL    |
| 368.2199 | 0.683916  | C20H32O6 [M+H-H2O] | 1.51E-09  | BioDeepD C05956 | HMDB000 |
| 167.9824 | 2.6740968 | C3H5O6P [M]+       | 0.0004025 | BioDeepD C00074 | HMDB000 |
| 183.0565 | 0.4534543 | C5H13NO [M+H]+     | 7.58E-05  | BioDeepD C00919 | NULL    |
| 161.0841 | 2.3875479 | C10H11N2O [M+H]+   | 5.61E-06  | BioDeepD C00955 | HMDB000 |
| 146.1055 | 0.7230092 | C6H14N2O [M]+      | 0.0050928 | BioDeepD C05161 | NULL    |
| 180.0423 | 0.6039047 | C9H8O4 [M]+        | 0.0001244 | BioDeepD C01405 | HMDB000 |
| 147.0532 | 9.9330412 | C5H9NO4 [M]+       | 0.0020582 | BioDeepD C05938 | HMDB000 |
| 203.0582 | 2.9902178 | C11H9NO [M+H]+     | 0.0006629 | BioDeepD C00331 | HMDB006 |
| 314.0684 | 3.1332117 | C10H20O7 [M]+      | 1.95E-22  | BioDeepD C00341 | NULL    |
| 156.0535 | 4.0172711 | C6H8N2O [M]+       | 0.0081368 | BioDeepD C03680 | HMDB000 |
| 210.1256 | 0.0724105 | C12H18O3 [M+H]+    | 5.29E-05  | BioDeepD C08491 | HMDB003 |
| 145.0851 | 0.0039584 | C5H11N3O [M+H]+    | 1.15E-06  | BioDeepD C01035 | HMDB000 |
| 217.1426 | 0.1289796 | C9H19N3O [M]+      | 3.85E-12  | BioDeepD C05341 | HMDB006 |
| 176.0321 | 6.4984427 | C6H8O6 [M]+        | 0.0002291 | BioDeepD C03217 | NULL    |
| 449.2849 | 0.0613032 | C19H39N5 [M+H-H2O] | 8.10E-06  | BioDeepD C00908 | NULL    |
| 200.0086 | 1.4129406 | C4H9O7P [M+H]+     | 0.00082   | BioDeepD C00279 | HMDB000 |
| 785.1571 | 7.8916664 | C27H33N9 [M-H]-    | 1.52E-08  | BioDeepD C00016 | HMDB000 |
| 196.0583 | 10.341504 | C6H12O7 [M-H]-     | 0.0011902 | BioDeepD C00800 | HMDB000 |
| 196.0583 | 1.3046694 | C6H12O7 [M-H]-     | 2.49E-08  | BioDeepD C00257 | HMDB000 |
| 104.0473 | 10.797863 | C4H8O3 [M-H]-      | 1.32E-09  | BioDeepD C01089 | HMDB000 |



|          |           |          |           |           |                 |         |
|----------|-----------|----------|-----------|-----------|-----------------|---------|
| 104.011  | 0.0895315 | C3H4O4   | [M-H]-    | 9.44E-17  | BioDeepD C00383 | NULL    |
| 250.0623 | 0.0106714 | C8H14N2O | [M-H]-    | 7.87E-41  | BioDeepD C00669 | HMDB000 |
| 123.032  | 3.0120084 | C6H5NO2  | [M-H]-    | 4.10E-08  | BioDeepD C00253 | HMDB000 |
| 168.0283 | 3.0209218 | C5H4N4O  | [M-H]-    | 2.23E-08  | BioDeepD C00366 | HMDB000 |
| 89.0477  | 2.4279616 | C3H7NO2  | [M]-      | 7.05E-09  | BioDeepD C00099 | HMDB000 |
| 94.0089  | 6.5411722 | C2H6O2S  | [M-H]-    | 2.98E-06  | BioDeepD C11142 | HMDB000 |
| 117.0538 | 1.1035885 | C3H7N3O  | [M]-      | 3.68E-10  | BioDeepD C00581 | HMDB000 |
| 191.0582 | 1.8826593 | C10H9NO  | [M]-      | 5.04E-10  | BioDeepD C05635 | HMDB000 |
| 347.0631 | 0.0147563 | C10H14N5 | [M-H]-    | 3.94E-16  | BioDeepD C00362 | HMDB000 |
| 118.0266 | 10.853028 | C4H6O4   | [M-H]-    | 1.76E-08  | BioDeepD C02170 | HMDB000 |
| 131.0946 | 1.308049  | C6H13NO  | [M-H]-    | 6.95E-08  | BioDeepD C00407 | HMDB000 |
| 165.079  | 5.7280826 | C9H11NO  | [M-H]-    | 1.29E-08  | BioDeepD C00079 | HMDB000 |
| 136.0385 | 2.5515813 | C5H4N4O  | [M-H]-    | 2.25E-07  | BioDeepD C00262 | HMDB000 |
| 180.0634 | 6.5207022 | C6H12O6  | [M-H]-    | 4.17E-14  | BioDeepD C00124 | NULL    |
| 118.0266 | 1.4922174 | C4H6O4   | [M-H]-    | 6.17E-08  | BioDeepD C00042 | HMDB000 |
| 117.079  | 4.9188866 | C5H11NO  | [M-H]-    | 1.11E-10  | BioDeepD C00431 | HMDB000 |
| 427.0294 | 1.116138  | C10H15N5 | [M-H]-    | 3.03E-27  | BioDeepD C00008 | HMDB000 |
| 339.996  | 0.2559534 | C6H14O12 | [M-H]-    | 5.63E-20  | BioDeepD C00354 | HMDB000 |
| 120.0575 | 1.976829  | C8H8O    | [M]-      | 3.65E-08  | BioDeepD C00601 | HMDB000 |
| 122.0579 | 5.6854799 | C4H10O4  | [M-H]-    | 1.66E-22  | BioDeepD C00503 | NULL    |
| 204.0899 | 1.4780577 | C11H12N2 | [M-H]-    | 1.65E-09  | BioDeepD C00078 | HMDB000 |
| 113.0589 | 2.0628113 | C4H7N3O  | [M]-      | 7.58E-21  | BioDeepD C00791 | HMDB000 |
| 152.0685 | 4.8723957 | C5H12O5  | [M-H]-    | 6.34E-08  | BioDeepD C01904 | HMDB000 |
| 102.0681 | 5.7031529 | C5H10O2  | [M-H]-    | 0.0003296 | BioDeepD C18319 | HMDB000 |
| 182.079  | 3.731179  | C6H14O6  | [M-H]-    | 1.07E-07  | BioDeepD C00794 | HMDB000 |
| 106.0266 | 3.2775415 | C3H6O4   | [M-H]-    | 1.39E-09  | BioDeepD C00258 | HMDB000 |
| 88.016   | 0.3730858 | C3H4O3   | [M-H]-    | 1.16E-08  | BioDeepD C00022 | HMDB000 |
| 192.027  | 1.1633441 | C6H8O7   | [M-H]-    | 1.40E-40  | BioDeepD C00158 | HMDB000 |
| 288.2089 | 0.542362  | C19H28O2 | [M-H2O-H] | 9.38E-09  | BioDeepD C01227 | HMDB000 |
| 242.0903 | 0.5112289 | C10H14N2 | [M]-      | 1.89E-18  | BioDeepD C00214 | HMDB000 |
| 152.0685 | 3.5179216 | C5H12O5  | [M-H]-    | 4.66E-08  | BioDeepD C00379 | HMDB000 |
| 117.079  | 6.3265391 | C5H11NO  | [M-H]-    | 2.64E-17  | BioDeepD C00183 | HMDB000 |
| 272.1776 | 0.5630335 | C18H24O2 | [M-H]-    | 6.65E-08  | BioDeepD C02537 | HMDB000 |
| 121.0891 | 4.1070959 | C8H11N   | [M]-      | 8.00E-26  | BioDeepD C05332 | HMDB001 |
| 134.0215 | 4.445611  | C4H6O5   | [M-H]-    | 4.97E-07  | BioDeepD C00149 | HMDB000 |
| 160.0372 | 1.2602526 | C6H8O5   | [M-H]-    | 2.25E-07  | BioDeepD C00322 | HMDB000 |
| 141.0191 | 1.1892758 | C2H8NO4  | [M-H]-    | 2.63E-40  | BioDeepD C00346 | HMDB000 |
| 132.0059 | 3.1456607 | C4H4O5   | [M-H2O-H] | 6.80E-06  | BioDeepD C00036 | HMDB000 |
| 384.1216 | 0.1761179 | C14H20N6 | [M-H]-    | 6.28E-62  | BioDeepD C00021 | HMDB000 |
| 116.011  | 4.4499519 | C4H4O4   | [M-H]-    | 3.16E-16  | BioDeepD C00122 | HMDB000 |

|           |           |                   |          |                 |         |
|-----------|-----------|-------------------|----------|-----------------|---------|
| 243.0855  | 0.0518633 | C9H13N3C [M]-     | 1.53E-10 | BioDeepD C00475 | NULL    |
| 145.1579  | 2.2783375 | C7H19N3 [M-H]-    | 3.12E-06 | BioDeepD C00315 | HMDB000 |
| 192.0634  | 0.0163496 | C7H12O6 [M-H]-    | 2.21E-11 | BioDeepD C00296 | NULL    |
| 309.9855  | 1.5046585 | C5H12O11 [M-H]-   | 1.02E-13 | BioDeepD C01151 | HMDB001 |
| 152.0685  | 4.1821751 | C5H12O5 [M-H]-    | 1.03E-07 | BioDeepD C00474 | HMDB000 |
| 194.079   | 0.4827354 | C7H14O6 [M]-      | 1.71E-07 | BioDeepD C03619 | NULL    |
| 153.0426  | 3.0269373 | C7H7NO3 [M-H]-    | 7.60E-11 | BioDeepD C00632 | HMDB000 |
| 138.0429  | 1.1387402 | C6H6N2O [M-H]-    | 7.47E-41 | BioDeepD C00785 | HMDB000 |
| 138.0317  | 5.8829285 | C7H6O3 [M-H]-     | 2.03E-20 | BioDeepD C00156 | HMDB000 |
| 119.0582  | 1.4731363 | C4H9NO3 [M-H]-    | 4.50E-05 | BioDeepD C00263 | HMDB000 |
| 139.9875  | 2.7908607 | C2H5O5P [M-H]-    | 6.73E-08 | BioDeepD C05682 | HMDB000 |
| 403.0182  | 0.7440091 | C9H15N3C [M-H]-   | 1.28E-10 | BioDeepD C00112 | HMDB000 |
| 120.0245  | 2.948089  | C4H8O2S [M-H]-    | 0.003384 | BioDeepD C08276 | HMDB000 |
| 115.0269  | 0.0510911 | C4H5NO3 [M]-      | 5.90E-05 | BioDeepD C01596 | NULL    |
| 226.1066  | 1.4036369 | C9H14N4C [M-H]-   | 4.44E-08 | BioDeepD C00386 | HMDB000 |
| 362.2093  | 14.96312  | C21H30O5 [M-H]-   | 2.15E-06 | BioDeepD C00735 | HMDB000 |
| 267.0968  | 0.0514864 | C10H13N5 [M-H]-   | 5.36E-76 | BioDeepD C00330 | HMDB000 |
| 441.1397  | 1.9305231 | C19H19N7 [M]-     | 7.27E-08 | BioDeepD C00504 | HMDB000 |
| 402.3498  | 1.1276215 | C27H46O2 [M-H]-   | 6.39E-06 | BioDeepD C15519 | HMDB000 |
| 280.2402  | 0.1274921 | C18H32O2 [M-H]-   | 4.90E-07 | BioDeepD C04056 | HMDB000 |
| 230.0192  | 1.6444587 | C5H11O8F [M-H]-   | 4.89E-11 | BioDeepD C00117 | HMDB000 |
| 290.0403  | 0.0851114 | C7H15O10 [M-H]-   | 3.79E-11 | BioDeepD C05382 | NULL    |
| 180.0634  | 7.9523195 | C6H12O6 [M-H]-    | 5.03E-08 | BioDeepD C00267 | HMDB000 |
| 607.0816  | 11.482222 | C17H27N3 [M-H]-   | 1.23E-07 | BioDeepD C00043 | HMDB000 |
| 178.0477  | 4.8938215 | C6H10O6 [M-H]-    | 3.00E-07 | BioDeepD C00198 | HMDB000 |
| 104.04734 | 11.252274 | C4H8O3 [M-H]-     | 2.61E-08 | BioDeepD C01089 | HMDB000 |
| 185.9929  | 4.259268  | C3H7O7P [M-H]-    | 8.99E-11 | BioDeepD C00197 | HMDB006 |
| 304.2402  | 0.0003298 | C20H32O2 [M-H]-   | 8.95E-18 | BioDeepD C00219 | HMDB000 |
| 180.0634  | 5.300043  | C6H12O6 [M-H]-    | 5.88E-10 | BioDeepD C15923 | HMDB001 |
| 330.2559  | 3.5693521 | C22H34O2 [M-H]-   | 1.99E-12 | BioDeepD C16513 | HMDB000 |
| 338.0628  | 5.4603982 | C9H15N4C [M-H2O-H | 4.91E-05 | BioDeepD C04677 | HMDB000 |
| 284.0757  | 0.2914491 | C10H12N4 [M-H]-   | 1.19E-10 | BioDeepD C01762 | HMDB000 |
| 187.1208  | 4.4876037 | C9H17NO [M-H]-    | 0.000101 | BioDeepD C01092 | NULL    |
| 363.058   | 2.6802948 | C10H14N5 [M-H]-   | 2.98E-19 | BioDeepD C00144 | HMDB000 |
| 178.0477  | 6.7086824 | C6H10O6 [M-H]-    | 1.76E-05 | BioDeepD C00204 | NULL    |
| 404.0022  | 1.2632898 | C9H14N2C [M-H]-   | 7.69E-11 | BioDeepD C00015 | HMDB000 |
| 150.0528  | 5.6313769 | C5H10O5 [M-H2O-H  | 9.43E-06 | BioDeepD C00310 | HMDB000 |
| 566.055   | 7.4792475 | C15H24N2 [M-H]-   | 3.36E-09 | BioDeepD C00029 | HMDB000 |
| 230.0192  | 0.4696667 | C5H11O8F [M-H2O-H | 9.67E-10 | BioDeepD C00620 | HMDB000 |
| 296.2351  | 1.563202  | C18H32O3 [M-H]-   | 5.76E-17 | BioDeepD C14825 | HMDB000 |

|           |           |                  |           |                 |         |
|-----------|-----------|------------------|-----------|-----------------|---------|
| 178.04774 | 5.2669141 | C6H10O6 [M-H]-   | 1.71E-06  | BioDeepD C01040 | NULL    |
| 328.2402  | 2.8019875 | C22H32O2[M-H]-   | 1.07E-07  | BioDeepD C06429 | HMDB000 |
| 152.0685  | 10.49387  | C5H12O5 [M-H]-   | 1.52E-10  | BioDeepD C00532 | HMDB000 |
| 194.0427  | 5.5668856 | C6H10O7 [M-H]-   | 0.0049577 | BioDeepD C00333 | NULL    |
| 183.0532  | 8.7747871 | C8H9NO4 [M-H]-   | 1.96E-09  | BioDeepD C00847 | HMDB000 |
| 228.13616 | 1.2619635 | C12H20O4[M-H]-   | 6.61E-11  | BioDeepD C16308 | HMDB009 |
| 194.0427  | 3.1955663 | C6H10O7 [M-H2O-H | 0.0010079 | BioDeepD C06473 | NULL    |
| 244.0348  | 1.6273905 | C6H13O8F[M-H]-   | 8.75E-08  | BioDeepD C02985 | HMDB000 |
| 767.1152  | 13.817314 | C21H36N7[M-H]-   | 2.94E-07  | BioDeepD C00010 | HMDB000 |
| 242.0804  | 0.1331547 | C12H10N4[M-H]-   | 5.22E-09  | BioDeepD C01727 | NULL    |
| 665.1248  | 13.220678 | C21H29N7[M-H]-   | 3.21E-08  | BioDeepD C00004 | HMDB000 |
| 180.0634  | 0.56016   | C6H12O6 [M-H]-   | 1.18E-09  | BioDeepD C00159 | HMDB000 |
| 687.1489  | 14.970155 | C21H35N7[M-H]-   | 1.00E-06  | BioDeepD C00882 | HMDB000 |
| 664.1169  | 1.0122321 | C21H28N7[M-H]-   | 9.02E-15  | BioDeepD C00003 | HMDB000 |
| 137.0477  | 6.5289855 | C7H7NO2 [M-H]-   | 2.55E-05  | BioDeepD C00108 | HMDB000 |
| 389.9518  | 2.8075199 | C5H13O14[M-H2O-H | 0.0070595 | BioDeepD C00119 | HMDB000 |
| 204.1236  | 0.0853452 | C9H18NO [M-H]-   | 6.05E-08  | BioDeepD C02571 | NULL    |
| 150.0528  | 9.0015334 | C5H10O5 [M-H2O-H | 0.0033032 | BioDeepD C00181 | HMDB000 |
| 240.0238  | 3.8928344 | C6H12N2C[M-H]-   | 9.38E-07  | BioDeepD C00491 | HMDB000 |
| 161.0688  | 9.5178385 | C6H11NO [M-H2O-H | 4.08E-08  | BioDeepD C00956 | HMDB000 |
| 192.027   | 4.8272735 | C6H8O7 [M-H]-    | 1.36E-05  | BioDeepD C00311 | HMDB000 |
| 171.9524  | 11.402504 | C6H5BrO [M-H]-   | 0.0270557 | BioDeepD C14453 | HMDB006 |
| 172.01367 | 6.6140536 | C3H9O6P [M-H]-   | 4.69E-06  | BioDeepD C00093 | NULL    |
| 180.0634  | 0.3809087 | C6H12O6 [M-H]-   | 1.30E-06  | BioDeepD C00031 | HMDB000 |
| 274.009   | 1.7281912 | C6H11O10[M-H]-   | 4.72E-09  | BioDeepD C04037 | NULL    |
| 325.1009  | 2.1302779 | C11H19NC[M-H]-   | 1.75E-11  | BioDeepD C03410 | HMDB000 |
| 580.0343  | 4.2903606 | C15H22N2[M-H]-   | 1.82E-07  | BioDeepD C00167 | HMDB000 |
| 131.0582  | 9.8400884 | C5H9NO3 [M-H]-   | 1.13E-09  | BioDeepD C01073 | HMDB006 |
| 166.02661 | 10.024211 | C8H6O4 [M-H]-    | 2.85E-05  | BioDeepD C01606 | NULL    |
| 180.0634  | 7.8490201 | C6H12O6 [M-H]-   | 1.40E-05  | BioDeepD C00247 | NULL    |
| 97.9769   | 14.202134 | H3PO4 [M-H]-     | 1.06E-06  | BioDeepD C00009 | HMDB000 |
| 116.0473  | 9.3716088 | C5H8O3 [M-H]-    | 2.08E-06  | BioDeepD C00141 | HMDB000 |
| 194.0427  | 10.385044 | C6H10O7 [M-H]-   | 1.74E-05  | BioDeepD C00191 | HMDB000 |
| 293.1111  | 2.5104581 | C11H19NC[M-H2O-H | 1.92E-08  | BioDeepD C02713 | HMDB006 |
| 152.0473  | 10.921728 | C8H8O3 [M-H]-    | 7.51E-05  | BioDeepD C00642 | HMDB000 |
| 165.16596 | 7.5143675 | C9H9O3 [M-H]-    | 1.58E-05  | BioDeepD C01198 | NULL    |
| 210.0753  | 5.7959834 | C8H10N4C[M]-     | 0.0036415 | BioDeepD C16361 | HMDB000 |
| 314.2457  | 0.9488993 | C18H34O4[M-H]-   | 1.94E-07  | BioDeepD C14828 | HMDB000 |
| 244.0695  | 0.4418454 | C9H12N2C[M-H]-   | 6.14E-12  | BioDeepD C02067 | HMDB000 |
| 123.032   | 14.855407 | C6H5NO2 [M-H]-   | 1.52E-06  | BioDeepD C10164 | HMDB000 |

|          |           |          |           |          |                 |         |
|----------|-----------|----------|-----------|----------|-----------------|---------|
| 136.0372 | 11.827148 | C4H8O5   | [M-H]-    | 2.69E-06 | BioDeepD C01620 | HMDB000 |
| 139.0269 | 4.5638646 | C6H5NO3  | [M-H]-    | 1.19E-07 | BioDeepD C01020 | HMDB000 |
| 314.2457 | 2.2999174 | C18H34O4 | [M-H2O-H] | 1.94E-08 | BioDeepD C14829 | HMDB000 |
| 259.0457 | 2.5686163 | C6H14NO  | [M-H]-    | 7.17E-06 | BioDeepD C00352 | HMDB000 |
| 166.063  | 7.745323  | C9H10O3  | [M-H]-    | 9.92E-05 | BioDeepD C05607 | HMDB000 |
| 196.0596 | 12.404518 | C7H8N4O  | [M-H]-    | 2.58E-08 | BioDeepD C16360 | HMDB000 |
| 145.0739 | 9.2562198 | C6H11NO  | [M-H]-    | 9.65E-06 | BioDeepD C02946 | HMDB000 |

pubchem CAS

135398727 117-68-0

123727 3036-18-8

1130 59-43-8

439436 NULL

439896 NULL

115254 2226-71-3

2879 106-44-5

51 328-50-7 / 64-15-3

586 57-00-1

119 1956/12/2

6106 61-90-5

1188 69-89-6

12473 634-97-9

3469 490-79-9

439774 2922-42-1

439216 155-54-4 / 5988-19-2

124886 70-18-8

61503 79-33-4 / 10326-41-7

6057 60-18-4

445639 112-80-1

6137 63-68-3

33032 56-86-0

145742 147-85-3

247 107-43-7 / 590-46-5

60961 58-61-7

1135 65-71-4

58 600-18-0

70 816-66-0

985 1957/10/3

444539 140-10-3

444266 110-16-7

1174 66-22-8

439939 13095-48-2

1066 89-00-9

135398641 58-63-9

1245 1955/10/7

439312 53188-23-1 / 87-81-0

637542 7400-08-0 / 7400-08-0 501-98-4 / 501-98-4

439176 2457-80-9

68144 500-98-1  
10917 541-15-1  
13712 951-78-0  
91486 764-22-7  
5962 56-87-1  
5281116 112-86-7  
2682 36653-82-4  
9750 372-75-8  
439373 1128-23-0 / 3327-64-8  
351795 771-51-7  
5960 56-84-8  
1738 306-08-1  
439260 51-41-2  
493570 83-88-5  
54670067 50-81-7  
264 107-92-6 / 461-55-2  
1054 65-23-6  
5779 613-83-2 / 50-69-1  
243 65-85-0 / 766-76-7  
11005 544-63-8  
1123 107-35-7  
135398640 131-99-7  
3893 143-07-7  
135398635 118-00-3  
668 1957/4/5  
6131 63-37-6  
6288 72-19-5  
743 110-94-1  
785 123-31-9  
222528 83-44-3  
444795 302-79-4  
5997 57-88-5  
1021 487-90-1  
14180 1094-61-7  
649 504-07-4  
597 71-30-7  
6274 71-00-1  
5951 56-45-1  
85782 14883-87-5  
6267 70-47-3

650 431-03-8  
10430 503-74-2  
6322 74-79-3  
338 c(69-72-7, 63-36-5)  
903 1210-83-9  
10467 506-30-9  
65359 27025-41-8  
6613 79-83-4 / 20938-62-9 / 137-08-6  
339 2041-14-7  
5801 95-55-6  
1112 692-29-5  
161166 2922-83-0 / 343-65-7  
440707 152-58-9  
5280450 60-33-3  
7420 1999/6/9  
94715 655612-3  
996 108-95-2  
535 22059-21-8  
5862 52-90-4  
34755 485-80-3 / 29908-03-0  
440014 2584-71-6  
439174 7512-17-6  
439195 5328-37-0 / 147-81-9 / 87-72-9  
397 879-37-8  
91528 28822-73-3 / 3343-19-9  
979 156-39-8  
446284 10417-94-4  
6251 69-65-8  
5610 51-67-2  
999 103-82-2  
91493 921-62-0 / 53411-70-4  
1051 54-47-7  
439178 16462-44-5 / 528-50-7  
1045 110-60-1  
13730 16373-93-6  
2153 58-55-9  
5281929 1211-29-6 / 39924-52-2  
3845 492-27-3  
68841 407-41-0  
637511 104-55-2 / 14371-10-9

8742 138-59-0  
73563 3646-68-2  
70914 1188-37-0  
5281 57-11-4 / 646-29-7  
6076 60-92-4  
13711 951-77-9  
936 98-92-0  
5280335 123-78-4  
798 120-72-9  
6030 58-97-9  
105024 3211-76-5  
439498 19246-18-5  
6029 58-96-8  
6083 61-19-8  
441457 492-39-7  
92832 692-04-6  
137 106-60-5  
8113 111-42-2  
5283560 26993-30-6  
89594 1954/11/5  
NULL 5875-41-2  
2519 1958/8/2  
72 99-50-3  
6262 3184-13-2/70-26-8  
7405 98-79-3  
7680 103-81-1  
8082 110-89-4  
73323 523-98-8  
439197 131-48-6  
440018 25138-66-3/41656-56-8  
134601 22839-47-0  
135398634 73-40-5  
123938 636-58-8  
65533 59-56-3  
135398593 890-38-0  
1136 137-00-8  
41211 84-21-9  
439285 28319-77-9  
186 590-54-5  
794 NULL



473 583-92-6  
1014 3616-04-4 / 107-73-3  
457 3106-60-3  
439685 4042-36-8  
NULL 3105-95-1  
121997 696-06-0  
NULL 35121-78-9  
439924 1341-23-7  
978 150-13-0 / 2906-28-7  
199 306-60-5  
255720 3177-80-8  
656979 33965-42-3  
502 6851-51-0  
8663 135-19-3  
5280720 33964-75-9  
92258 28047-15-6  
38 470-30-4  
440113 7339-87-9  
1118 14808-79-8 / 7664-93-9  
107541 4347-18-6 / 2002-02-0  
NULL 2364-67-2  
21350391 NULL  
5312830 73543-67-6  
1052 85-87-0  
440364 6866-69-9  
203443 2037-48-1  
440046 2139/3/9  
190 73-24-5  
440864 600-15-7 / 3347-90-8  
338 69-72-7  
643327 7326-19-4 / 20312-36-1  
126041 96702-03-3  
187 51-84-3  
192781 NULL  
9548877 29774-12-7  
127 156-38-7  
873 495-78-3  
13804 987-78-0  
NULL 3168/1/2  
2724505 943-73-7

439903 NULL  
305 62-49-7  
445794 20762-30-5  
6054 1960/12/8  
1023 14000-31-8/2466-09-3  
440670 651-54-7  
5280398 28613-33-4  
6736 83-34-1  
6439873 89886-42-0  
119219 5707-55-1  
151276 5703-24-2  
6602426 608-53-7  
7018721 NULL  
439232 6205-08-9 / 2185-16-2  
135398653 79647-29-3  
5280876 136696-10-1  
86 548-93-6  
161234 NULL  
9727 370-98-9  
439168 591-57-1  
5280883 51982-36-6  
1005 138-08-9 / 73-89-2  
485 4858-96-2  
10685 526-55-6  
44514625 NULL  
2244 50-78-2  
440851 NULL  
803 35656-49-6 / 392-12-1  
445995 763-10-0  
128 17340-16-8 / 36117-26-7  
5281166 59366-47-1 / 6894-38-8  
500 463-00-3  
440638 NULL  
439945 NULL  
72396 26098-04-4  
122357 585-18-2  
643975 146-14-5  
6857417 20246-53-1/526-97-6  
10690 526-95-4  
92135 625-72-9/300-85-6

867 141-82-2 / 156-80-9  
123938 636-58-8  
938 59-67-6  
1175 69-93-2  
239 107-95-9  
6213 67-71-0  
763 352-97-6  
1826 54-16-0  
135398597 902-04-5  
487 516-05-2  
6306 73-32-5  
6140 63-91-2  
135398638 68-94-0  
6036 59-23-4 10257-28-0 / 10257-28-0 / 59-23-4  
1110 110-15-6  
138 660-88-8  
6022 58-64-0 / 20398-34-9  
172313 488-69-7  
998 122-78-1  
222285 149-32-6  
6305 73-22-3  
588 60-27-5  
94154 488-82-4  
8314 116-53-0  
5780 50-70-4  
439194 473-81-4  
1060 127-17-3 / 57-60-3  
311 77-92-9 / 126-44-3  
5881 53-43-0  
5789 50-89-5  
6912 87-99-0  
6287 72-18-4  
68570 57-91-0  
1001 64-04-0  
222656 97-67-6 / 6915-15-7  
71 3184-35-8  
1015 1071-23-4  
970 328-42-7 / 149-63-3  
439155 979-92-0  
444972 110-17-8

6175 65-46-3  
1102 124-20-9  
6508 77-95-2  
14035695 14689-84-0  
6912 488-81-3  
94214 1824-94-8  
86 548-93-6  
736715 104-98-3  
135 99-96-7/456-23-5  
12647 672-15-1 / 1927-25-9  
546 4408-78-0  
6132 63-38-7  
563 646-01-5  
5280451 557-24-4  
439224 305-84-0  
5754 50-23-7  
135398592 961-07-9  
135398658 59-30-3  
65094 2140-46-7  
5280644 2540-56-9  
439167 3615-55-2/4300-28-1/4151-19-3/62746-84-3  
165007 2646-35-7  
79025 492-62-6  
445675 528-04-1  
7027 90-80-2  
92135 625-72-9  
439183 3443-57-0  
444899 506-32-1  
10130220 6027-89-0  
5497182 24880-45-3  
65110 3031-94-5  
64959 146-80-5  
173 4707-58-8  
135398631 85-32-5  
161227 17510-99-5  
6031 58-98-0  
439204 2042-27-5/551-84-8  
8629 133-89-1  
439236 14075-00-4  
5316080 NULL

NULL 1128-23-0  
445580 6217-54-5  
439255 7643-75-6  
439215 685-73-4/6294-16-2  
6723 82-82-6  
NULL 6402-36-4  
3035456 669-90-9  
65369 16562-58-6/28553-11-9/NA  
87642 85-61-0  
5326566 1086-80-2  
439153 58-68-4  
18950 3458-28-4/3458-28-4 31103-86-3/530-26-7  
444485 3633-59-8  
5893 53-84-9  
227 118-92-3  
7339 7540-64-9  
439756 5080-50-2  
135191 58-86-6  
67678 56-89-3  
92136 542-32-5/1118-90-7  
1198 320-77-4  
7808 106-41-2  
439162 1957/3/4  
5793 50-99-7/50-99-7 2280-44-6/2280-44-6  
440203 NULL  
440001 1113-83-3  
17473 2616-64-0/63700-19-6  
76406 3025-95-4  
NULL 88-99-3  
439192 87-79-6  
1004 14066-19-4/7664-38-2/14265-44-2  
49 759-05-7  
94715 6556-12-3/528-16-5  
5462244 61633-75-8/10597-89-4  
127 156-38-7  
6930705 NULL  
79437 5415-44-1  
9966640 263399-34-4  
15047 1445-07-4  
1018 98-98-6

5460407 c(7306-96-9, 3909-12-4, 70753-61-6)

72924 5006-66-6

10236635 NULL

440997 3616-42-0

643327 7326-19-4

83126 13087-49-5

18189 3025-96-5
