# Supplementary material for: Network Pharmacology/Metabolomics‐Based Validation of AMPK and PI3K/AKT Signaling Pathway as a Central Role of Shengqi Fuzheng Injection Regulation of Mitochondrial Dysfunction in Cancer‐Related Fatigue
Source: Hindawi journal article supplement (doi:10.1155/2021/5556212), 2021-01-01
Supplement: f1 [file 5556212.f1.zip]

Table 1 36 candidate compounds in SFI

| Mol ID        | Mol Name                                                                  | OB (%) | DL   | Degree | Source | 2D Structure                                                                          | Reference |
|---------------|---------------------------------------------------------------------------|--------|------|--------|--------|---------------------------------------------------------------------------------------|-----------|
| MOL000<br>098 | Quercetin                                                                 | 46.43  | 0.28 | 167    | HQ     | 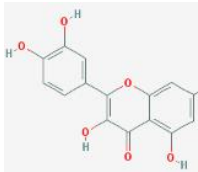   | (44)(45)  |
| MOL000<br>422 | Kaempferol                                                                | 41.88  | 0.24 | 68     | HQ     |    | (46)(47)  |
| MOL000<br>378 | 7-O-methylisomucronulatol                                                 | 74.69  | 0.3  | 48     | HQ     |    | (48)      |
| MOL000<br>392 | formononetin                                                              | 69.67  | 0.21 | 42     | HQ     |    | (49)(50)  |
| MOL000<br>354 | isorhamnetin                                                              | 49.6   | 0.31 | 38     | HQ     |   | (51)(52)  |
| MOL000<br>380 | (6aR,11aR)-9,10-dimethoxy-6a,11a-dihydro-6H-benzofuran[3,2-c]chromen-3-ol | 64.26  | 0.42 | 25     | HQ     |  | (53)      |
| MOL000<br>371 | 3,9-di-O-methylnissolin                                                   | 53.74  | 0.48 | 25     | HQ     |  | (54)      |
| MOL000<br>417 | Calycosin                                                                 | 47.75  | 0.24 | 25     | HQ     |  | (55)(56)  |
| MOL000<br>239 | Jaranol                                                                   | 50.83  | 0.29 | 16     | HQ     |  | (57)      |
| MOL000<br>387 | Bifendate                                                                 | 31.1   | 0.67 | 8      | HQ     |  | (58)(59)  |

|           |                                                                                                                                                            |       |      |     |    |                                                                                       |          |
|-----------|------------------------------------------------------------------------------------------------------------------------------------------------------------|-------|------|-----|----|---------------------------------------------------------------------------------------|----------|
| MOL000442 | 1,7-Dihydroxy-3,9-dimethoxy pterocarpene                                                                                                                   | 39.05 | 0.48 | 5   | HQ | 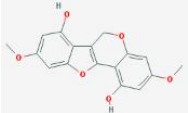   | (60)     |
| MOL004492 | Chrysanthemaxanthin                                                                                                                                        | 38.72 | 0.58 | 5   | HQ |    | (61)(62) |
| MOL000211 | Mairin                                                                                                                                                     | 55.38 | 0.78 | 1   | HQ |    | (48)     |
| MOL000033 | (3S,8S,9S,10R,13R,14S,17R)-10,13-dimethyl-17-[(2R,5S)-5-propan-2-yl]octan-2-yl]-2,3,4,7,8,9,11,12,14,15,16,17-dodecahydro-1H-cyclopenta[a]phenanthren-3-ol | 36.23 | 0.78 | 1   | HQ |    | (63)     |
| MOL000296 | hederagenin                                                                                                                                                | 36.91 | 0.75 | 1   | HQ |   | (64)(65) |
| MOL000449 | Stigmasterol                                                                                                                                               | 43.83 | 0.76 | 147 | DS |  | (66)(67) |
| MOL000006 | luteolin                                                                                                                                                   | 36.16 | 0.25 | 58  | DS |  | (68)(69) |
| MOL006554 | Taraxerol                                                                                                                                                  | 38.4  | 0.77 | 53  | DS |  | (70)(71) |
| MOL003896 | 7-Methoxy-2-methylisoflavone                                                                                                                               | 42.56 | 0.2  | 46  | DS |  | (72)     |
| MOL004355 | Spinasterol                                                                                                                                                | 42.98 | 0.76 | 39  | DS |  | (73)     |
| MOL008400 | glycitein                                                                                                                                                  | 50.48 | 0.24 | 26  | DS |  | (74)(75) |

|               |                                                                                                                                                                                      |       |      |    |    |                                                                                       |          |
|---------------|--------------------------------------------------------------------------------------------------------------------------------------------------------------------------------------|-------|------|----|----|---------------------------------------------------------------------------------------|----------|
| MOL007<br>059 | 3-beta-Hydroxymethyllen<br>etanshiquinone                                                                                                                                            | 32.16 | 0.41 | 18 | DS | 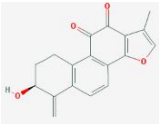   | (76)     |
| MOL005<br>321 | Frutinone A                                                                                                                                                                          | 65.9  | 0.34 | 17 | DS |    | (77)     |
| MOL002<br>140 | Perlolyrine                                                                                                                                                                          | 65.95 | 0.27 | 6  | DS |    | (78)(79) |
| MOL004<br>492 | Chrysanthemaxanthin                                                                                                                                                                  | 38.72 | 0.58 | 5  | DS |    | (61)(62) |
| MOL008<br>411 | 11-Hydroxyrankinidine                                                                                                                                                                | 40    | 0.66 | 4  | DS |    | (80)     |
| MOL003<br>036 | ZINC03978781                                                                                                                                                                         | 43.83 | 0.76 | 3  | DS |   | (81)     |
| MOL002<br>879 | Diop                                                                                                                                                                                 | 43.59 | 0.39 | 3  | DS |  | (82)     |
| MOL001<br>006 | poriferasta-7,22E-dien-3<br>beta-ol                                                                                                                                                  | 42.98 | 0.76 | 3  | DS |  | (83)     |
| MOL009<br>274 | Fritillaziebinol                                                                                                                                                                     | 55.05 | 0.34 | 2  | DS |  | (84)     |
| MOL008<br>407 | (8S,9S,10R,13R,14S,17R)<br>-17-[(E,2R,5S)-5-ethyl-6<br>-methylhept-3-en-2-yl]-<br>10,13-dimethyl-1,2,4,7,8,<br>9,11,12,14,15,16,17-dode<br>cahydrocyclopenta[a]phena<br>nthren-3-one | 45.4  | 0.76 | 2  | DS |  | (85)     |

|               |                                |       |      |   |    |                                                                                     |      |
|---------------|--------------------------------|-------|------|---|----|-------------------------------------------------------------------------------------|------|
| MOL006<br>774 | stigmast-7-enol                | 37.42 | 0.75 | 2 | DS | 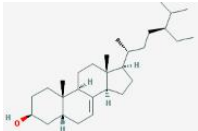 | (86) |
| MOL008<br>397 | Daturilin                      | 50.37 | 0.77 | 1 | DS |  | (87) |
| MOL012<br>377 | bessisterol                    | 42.98 | 0.76 | 1 | DS |  | (73) |
| MOL007<br>514 | methyl<br>icosa-11,14-dienoate | 39.67 | 0.23 | 1 | DS |  | (88) |
| MOL011<br>455 | 20-Hexadecanoylingenol         | 32.7  | 0.65 | 1 | DS |  | (89) |

Supplementary table 1. Network pharmacology analysis of SFI, obtained 36 potential effective substances.

Table 3 the affinity of compounds with proteins

| Protein | Compound                                                                                                                                                     | Affinity[<br>kcal/mol] |
|---------|--------------------------------------------------------------------------------------------------------------------------------------------------------------|------------------------|
| AMPK    | Taraxerol                                                                                                                                                    | -7.8                   |
|         | Chrysanthemaxanthin                                                                                                                                          | -7.5                   |
|         | Mairin                                                                                                                                                       | -7.4                   |
|         | bessisterol                                                                                                                                                  | -7.1                   |
|         | poriferasta-7,22E-dien-3beta-ol                                                                                                                              | -7.1                   |
|         | Spinasterol                                                                                                                                                  | -7.1                   |
|         | stigmast-7-enol                                                                                                                                              | -7.1                   |
|         | (8S,9S,10R,13R,14S,17R)-17-[(E,2R,5S)-5-ethyl-6-methylhept-3-en-2-yl]-10,13-dimethyl-1,2,4,7,8,9,11,12,14,15,16,17-dodecahydrocyclopenta[a]phenanthren-3-one | -7                     |
|         | hederagenin                                                                                                                                                  | -6.8                   |
|         | Stigmasterol                                                                                                                                                 | -6.8                   |
|         | 11-Hydroxyrankinidine                                                                                                                                        | -6.7                   |
|         | Frutinone A                                                                                                                                                  | -6.6                   |
|         | Perlolyrine                                                                                                                                                  | -6.4                   |
|         | (3S,8S,9S,10R,13R,14S,17R)-10,13-dimethyl-17-[(2R,5S)-5-propan-2-yl]octan-2-yl]-2,3,4,7,8,9,11,12,14,15,16,17-dodecahydro-1H-cyclopenta[a]phenanthren-3-ol   | -6.2                   |
|         | formononetin                                                                                                                                                 | -6.1                   |
|         | Calycosin                                                                                                                                                    | -6                     |
|         | 3,9-di-O-methylnissolin                                                                                                                                      | -6                     |
|         | glycitein                                                                                                                                                    | -6                     |
|         | Quercetin                                                                                                                                                    | -5.9                   |
|         | 7-Methoxy-2-methyl isoflavone                                                                                                                                | -5.8                   |
|         | luteolin                                                                                                                                                     | -5.8                   |
|         | 7-O-methylisomucronulatol                                                                                                                                    | -5.6                   |
|         | isorhamnetin                                                                                                                                                 | -5.5                   |
|         | Jaranol                                                                                                                                                      | -5.5                   |
|         | Kaempferol                                                                                                                                                   | -5.5                   |
|         | Bifendate                                                                                                                                                    | -5.3                   |
|         | Diop                                                                                                                                                         | -5.2                   |
|         | methylicosa-11,14-dienoate                                                                                                                                   | -4.3                   |
|         | 20-Hexadecanoylingenol                                                                                                                                       | 0                      |
|         | 1,7-Dihydroxy-3,9-dimethoxy pterocarpene                                                                                                                     | 0                      |
|         | Fritillaziebinol                                                                                                                                             | 0                      |

| Protein | Compound                                                                                                                                      | Affinity[<br>kcal/mo<br>l] |
|---------|-----------------------------------------------------------------------------------------------------------------------------------------------|----------------------------|
| SIRT1   | Taraxerol                                                                                                                                     | -7.2                       |
|         | Chrysanthemaxanthin                                                                                                                           | -7.1                       |
|         | Mairin                                                                                                                                        | -6.9                       |
|         | Stigmasterol                                                                                                                                  | -6.4                       |
|         | (3S,8S,9S,10R,13R,14S,17R)-10,13-dimethyl-17-[(2R,5S)-5-propan-2-yl<br>octan-2-yl]-2,3,4,7,8,9,11,12,14,15,16,17-dodecahydro-1H-cyclopenta[a] | -6.3                       |
|         | phenanthren-3-ol                                                                                                                              |                            |
|         | poriferasta-7,22E-dien-3beta-ol                                                                                                               | -6.3                       |
|         | 11-Hydroxyrankinidine                                                                                                                         | -6.2                       |
|         | bessisterol                                                                                                                                   | -6.2                       |
|         | (8S,9S,10R,13R,14S,17R)-17-[(E,2R,5S)-5-ethyl-6-methylhept-3-en-2-<br>yl]-10,13-dimethyl-1,2,4,7,8,9,11,12,14,15,16,17-dodecahydrocyclopenta[ | -6.2                       |
|         | a]phenanthren-3-one                                                                                                                           |                            |
|         | hederagenin                                                                                                                                   | -6.1                       |
|         | Kaempferol                                                                                                                                    | -6.1                       |
|         | Spinasterol                                                                                                                                   | -6.1                       |
|         | Frutinone A                                                                                                                                   | -6                         |
|         | isorhamnetin                                                                                                                                  | -6                         |
|         | Quercetin                                                                                                                                     | -6                         |
|         | stigmast-7-enol                                                                                                                               | -6                         |
|         | luteolin                                                                                                                                      | -5.8                       |
|         | 3,9-di-O-methylnissolin                                                                                                                       | -5.7                       |
|         | glycitein                                                                                                                                     | -5.6                       |
|         | Jaranol                                                                                                                                       | -5.6                       |
|         | 7-Methoxy-2-methyl isoflavone                                                                                                                 | -5.4                       |
|         | Perlolyrine                                                                                                                                   | -5.4                       |
|         | Calycosin                                                                                                                                     | -5.3                       |
|         | formononetin                                                                                                                                  | -5.3                       |
|         | 7-O-methylisomucronulatol                                                                                                                     | -5.1                       |
|         | Bifendate                                                                                                                                     | -4.8                       |
|         | Diop                                                                                                                                          | -4.2                       |
|         | methylicosa-11,14-dienoate                                                                                                                    | -4.1                       |
|         | 20-Hexadecanoylingenol                                                                                                                        | 0                          |
|         | 1,7-Dihydroxy-3,9-dimethoxy pterocarpene                                                                                                      | 0                          |
|         | Fritillaziebinol                                                                                                                              | 0                          |

| Protein | Compound                                                                                                                                                     | Affinity[<br>kcal/mo<br>l] |
|---------|--------------------------------------------------------------------------------------------------------------------------------------------------------------|----------------------------|
| Akt1    | Taraxerol                                                                                                                                                    | -8.6                       |
|         | hederagenin                                                                                                                                                  | -8.1                       |
|         | 11-Hydroxyrankinidine                                                                                                                                        | -7.7                       |
|         | poriferasta-7,22E-dien-3beta-ol                                                                                                                              | -7.6                       |
|         | Spinasterol                                                                                                                                                  | -7.6                       |
|         | Mairin                                                                                                                                                       | -7.5                       |
|         | Calycosin                                                                                                                                                    | -7.3                       |
|         | formononetin                                                                                                                                                 | -7.3                       |
|         | stigmast-7-enol                                                                                                                                              | -7.3                       |
|         | 7-Methoxy-2-methyl isoflavone                                                                                                                                | -7.1                       |
|         | (8S,9S,10R,13R,14S,17R)-17-[(E,2R,5S)-5-ethyl-6-methylhept-3-en-2-yl]-10,13-dimethyl-1,2,4,7,8,9,11,12,14,15,16,17-dodecahydrocyclopenta[a]phenanthren-3-one | -7                         |
|         | Stigmasterol                                                                                                                                                 | -7                         |
|         | bessisterol                                                                                                                                                  | -6.9                       |
|         | Frutinone A                                                                                                                                                  | -6.9                       |
|         | luteolin                                                                                                                                                     | -6.8                       |
|         | Perlolyrine                                                                                                                                                  | -6.7                       |
|         | (3S,8S,9S,10R,13R,14S,17R)-10,13-dimethyl-17-[(2R,5S)-5-propan-2-yl]octan-2-yl]-2,3,4,7,8,9,11,12,14,15,16,17-dodecahydro-1H-cyclopenta[a]phenanthren-3-ol   | -6.6                       |
|         | Quercetin                                                                                                                                                    | -6.5                       |
|         | glycitein                                                                                                                                                    | -6.4                       |
|         | isorhamnetin                                                                                                                                                 | -6.4                       |
|         | Jaranol                                                                                                                                                      | -6.4                       |
|         | Kaempferol                                                                                                                                                   | -6.4                       |
|         | 3,9-di-O-methylnissolin                                                                                                                                      | -6.3                       |
|         | Chrysanthemaxanthin                                                                                                                                          | -6.1                       |
|         | 7-O-methylisomucronulatol                                                                                                                                    | -5.9                       |
|         | Bifendate                                                                                                                                                    | -5.4                       |
|         | Diop                                                                                                                                                         | -4.9                       |
|         | methylicosa-11,14-dienoate                                                                                                                                   | -4.2                       |
|         | 20-Hexadecanoylingenol                                                                                                                                       | 0                          |
|         | 1,7-Dihydroxy-3,9-dimethoxy pterocarpene                                                                                                                     | 0                          |
|         | Fritillaziebinol                                                                                                                                             | 0                          |

Supplementary table 3. Molecular docking of SFI to CRF-gene targets. The affinity of compounds with the main proteins of AMPK, SIRT1 and Akt1.

Table 4 40 differential metabolites in all cell samples

|                                    | VIP         | p.value     | FDR         |
|------------------------------------|-------------|-------------|-------------|
| 1-Aminocyclopropanecarboxylic acid | 1.602262994 | 0.005074868 | 0.03754334  |
| 2-Hydroxybutyric acid              | 1.472707402 | 0.005074868 | 0.03754334  |
| L-Serine                           | 1.018988377 | 0.005074868 | 0.03754334  |
| 5,6-Dihydro-5-fluorouracil         | 1.491822289 | 0.005074868 | 0.03754334  |
| L-Asparagine                       | 1.192793899 | 0.005074868 | 0.03754334  |
| 2-Phenylacetamide                  | 1.143837204 | 0.005074868 | 0.03754334  |
| Acetylcholine                      | 1.864338595 | 0.005074868 | 0.03754334  |
| L-Methionine                       | 1.494624693 | 0.005074868 | 0.03754334  |
| Xanthine                           | 1.920662876 | 0.005074868 | 0.03754334  |
| Imidazol-5-yl-pyruvate             | 1.90084649  | 0.005074868 | 0.03754334  |
| L-Histidine                        | 1.485095642 | 0.005074868 | 0.03754334  |
| 5-Acetamidovalerate                | 1.394931145 | 0.005074868 | 0.03754334  |
| L-Carnitine                        | 1.190601268 | 0.005074868 | 0.03754334  |
| 1H-Indole-3-acetamide              | 1.91001781  | 0.005074868 | 0.03754334  |
| D-Fructose                         | 2.276940441 | 0.005074868 | 0.03754334  |
| L-Tyrosine                         | 1.163651484 | 0.005074868 | 0.03754334  |
| Phosphorylcholine                  | 1.463136563 | 0.005074868 | 0.03754334  |
| Indolepyruvate                     | 1.037186124 | 0.005074868 | 0.03754334  |
| N-Acetyl-D-glucosamine             | 1.723120107 | 0.005074868 | 0.03754334  |
| Nicotinamide riboside              | 1.299094078 | 0.005074868 | 0.03754334  |
| Nicotinamide ribotide              | 1.022754915 | 0.005074868 | 0.03754334  |
| Guanosine 3'-phosphate             | 1.437947934 | 0.008239019 | 0.050351152 |
| gamma-Aminobutyric acid            | 1.344822251 | 0.013065227 | 0.065214782 |
| 2-Deoxystreptamine                 | 1.269355911 | 0.013065227 | 0.065214782 |
| Alpha-dimorphecolic acid           | 2.055613825 | 0.013065227 | 0.065214782 |
| Ornithine                          | 1.340886211 | 0.020240571 | 0.087485074 |
| 3'-AMP                             | 1.823033109 | 0.020240571 | 0.087485074 |
| Uracil                             | 1.645344232 | 0.030638988 | 0.113691028 |
| Phenylacetyl glycine               | 1.788939439 | 0.030638988 | 0.113691028 |
| Vanillylmandelic acid              | 1.317203783 | 0.030638988 | 0.113691028 |
| Pyrrole-2-carboxylic acid          | 1.01533553  | 0.045327562 | 0.143367285 |



|                                 |             |             |             |
|---------------------------------|-------------|-------------|-------------|
| 2-Dehydropantoate               | 1.632256994 | 0.045327562 | 0.143367285 |
| D-Cathine                       | 1.674119951 | 0.045327562 | 0.143367285 |
| 3-Indoleacetonitrile            | 1.343442459 | 0.045327562 | 0.143367285 |
| L-Sorbose                       | 1.37354756  | 0.00277843  | 0.082746154 |
| D-Glucosamine 6-phosphate       | 1.884791784 | 0.005074868 | 0.082746154 |
| 1-Phospho-alpha-D-galacturonate | 1.128275443 | 0.005074868 | 0.082746154 |
| Pantetheine 4'-phosphate        | 1.925212522 | 0.005074868 | 0.082746154 |
| Citrulline                      | 1.286770048 | 0.008239019 | 0.101745008 |
| Ribose 1-phosphate              | 1.55832126  | 0.008239019 | 0.101745008 |

Supplementary table 4. Metabolomics analysis identified 40 potential biomarkers.
