# Supplementary material for: Network Pharmacology/Metabolomics‐Based Validation of AMPK and PI3K/AKT Signaling Pathway as a Central Role of Shengqi Fuzheng Injection Regulation of Mitochondrial Dysfunction in Cancer‐Related Fatigue
Source: Hindawi journal article supplement (doi:10.1155/2021/5556212), 2021-01-01
Supplement: f1 [file 5556212.f1.zip]

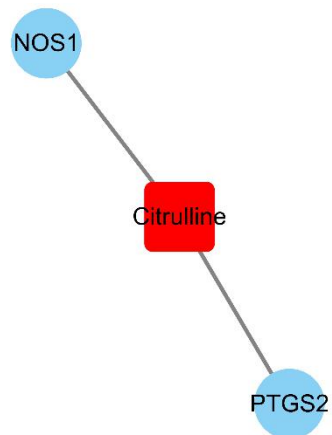

Fig 1 citrulline and its genes

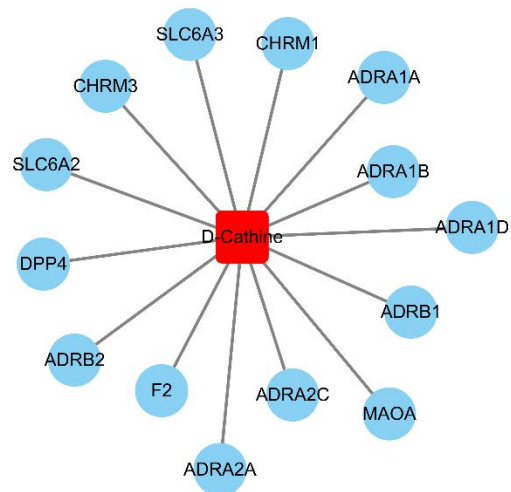

Fig 2 D-Cathine and its genes

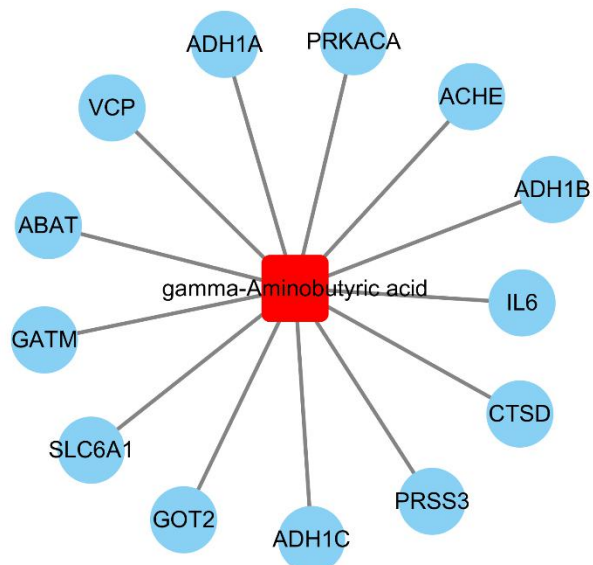

Fig 3 Gamma-Aminobutyric acid and its genes

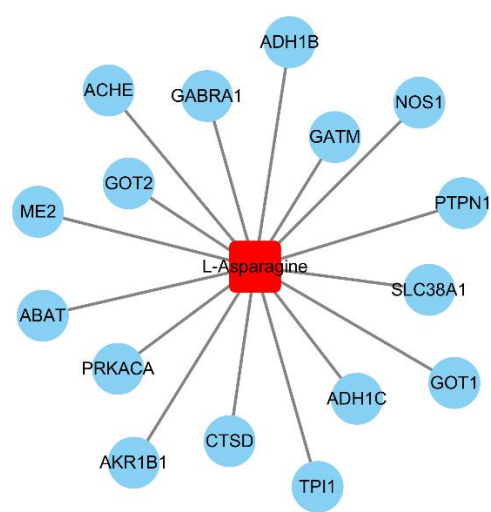

Fig 4 L-Asparagine and its genes

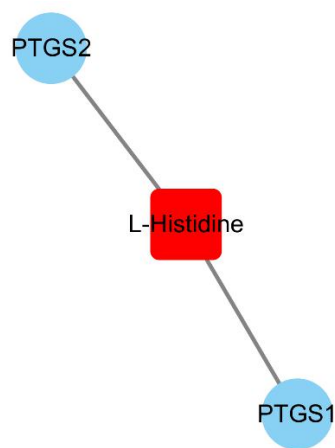

Fig 5 L-Histidine and its genes

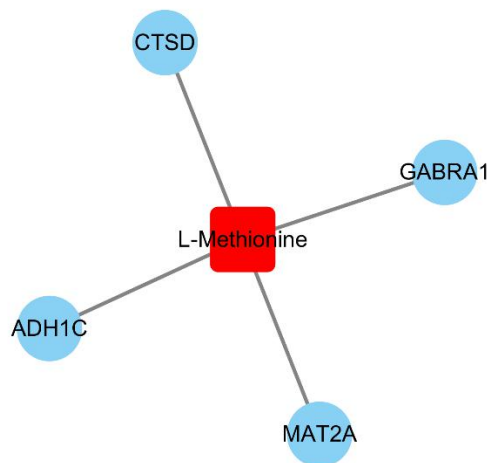

Fig 6 L-Methionine and its genes

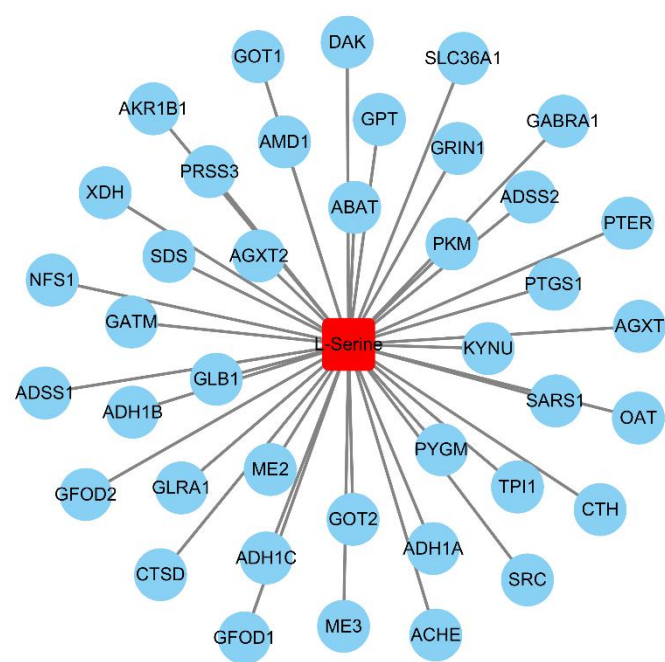

Fig 7 L-Serine and its genes

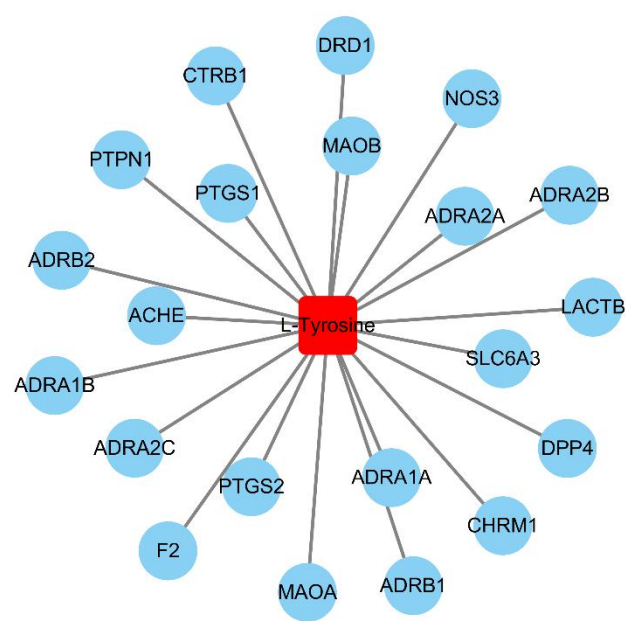

Fig 8 L-Tyrosine and its genes

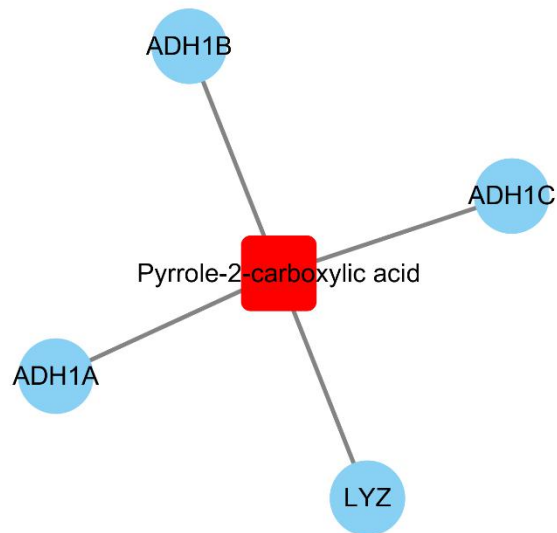

Fig 9 Pyrrole-2-carboxylic acid and its genes

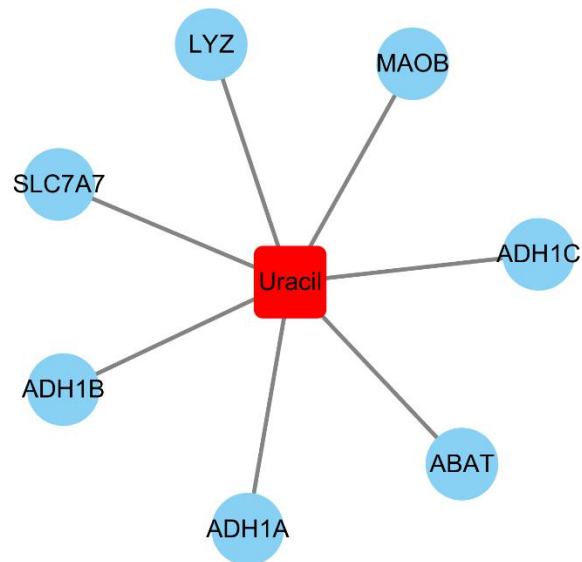

Fig 10 Uracil and its genes

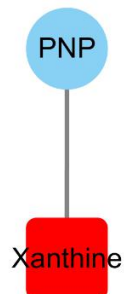

Fig 11 Xanthine and its genes

Supplementary figure 1-11. The relationship between genes and metabolites. Based on the results of metabonomics, obtained 11 effective metabolites, and their target genes.
